# Supplementary material for: Simplifying the growth of hybrid single-crystals by using nanoparticle precursors: the case of AgI
Source: Royal Society of Chemistry journal article supplement (doi:10.1039/c2nr30139c), 2012-01-01
Supplement: c2nr30139c.pdf [file c2nr30139c.pdf]

## Supporting Information

### 1. Characterizations of the AgISNPs and BNPs

For PXRD pattern of AgI SNPs (Fig. 1(b)), based on the first peak, the grain size of the AgI SNPs calculated from the Scherrer's equation<sup>S1</sup> ( $D = 0.89\lambda/\beta\cos\theta$ , where  $\lambda$ ,  $\beta$  and  $\theta$  are the wavelength of incident X-ray, FWHM of diffraction peak in radian and the diffraction angle, respectively.) is 1.0 nm.

The XPS (Fig S1) clearly show the Ag 3d<sub>3/2</sub> and 3d<sub>5/2</sub> peaks at 374nm and 368nm and the I 3d<sub>3/2</sub> and 3d<sub>5/2</sub> peaks at 631nm and 619 nm for AgI SNPs (2) and AgI BNPs (3), which confirm that Ag and I are in +1 and -1 valence compared with bulk AgI powders (1).

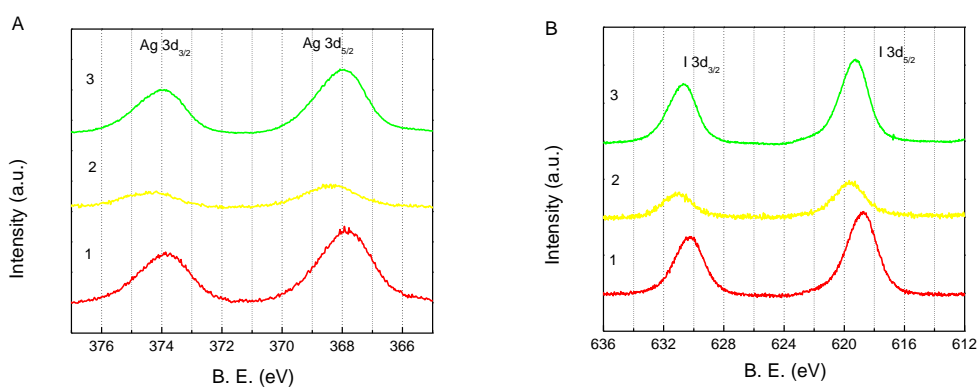

**Fig. S1** XPS profiles of a) Ag 3d peaks and b) I 3d peaks of AgI Bulk (red), AgI SNPs (yellow) and AgI BNPs (green)

#### Reference

S1 B. E. Warren, *X-ray Diffraction*; Constable and Company Ltd. U.K., London, **1990**;

## 2. Growth processes

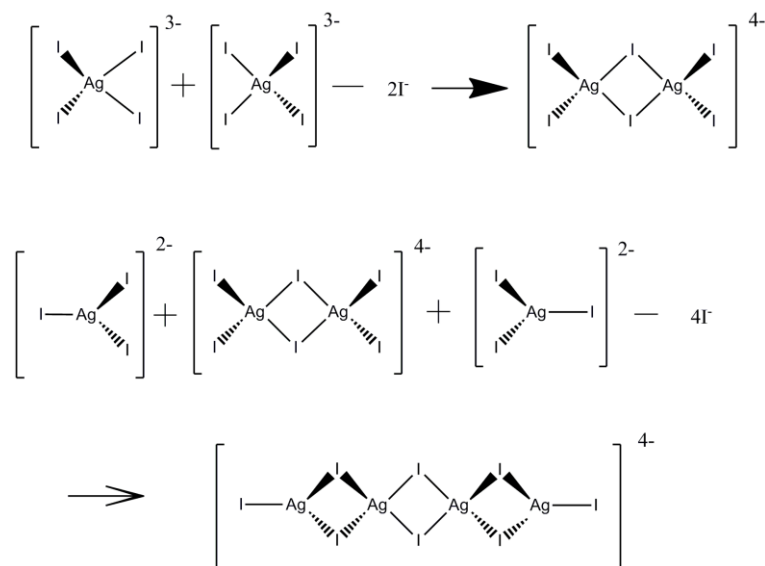

**Scheme S2** Formation process of  $[\text{Ag}_4\text{I}_8]^{4-}$  in **2**

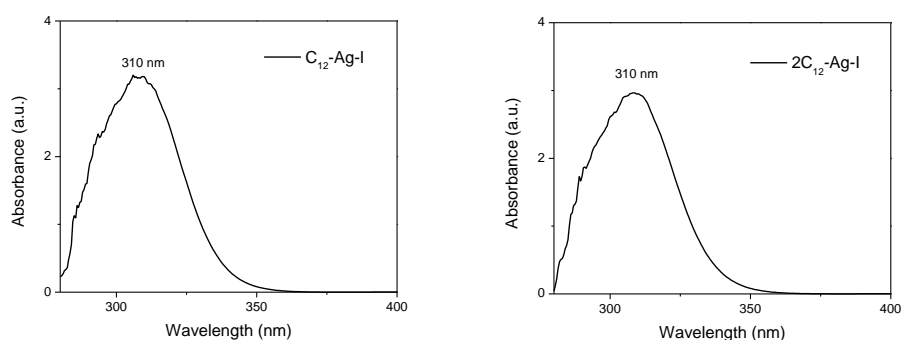

**Fig S2** UV-Vis spectra of the  $\text{CH}_2\text{Cl}_2$  phase after layering water phase and the  $\text{CH}_2\text{Cl}_2$  phase for 12hrs.

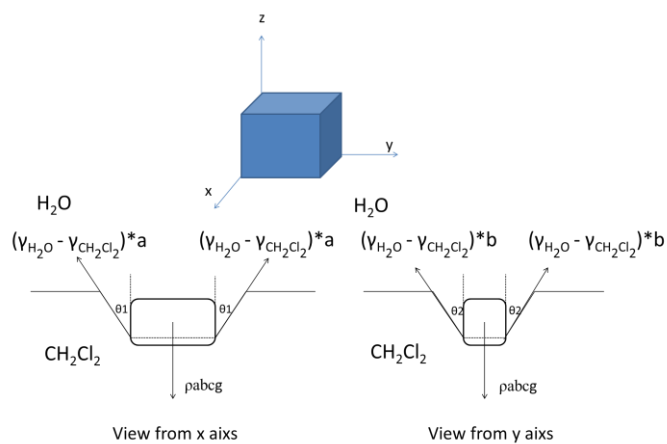

**Scheme S3** Force balance of a crystal at the interface between  $\text{H}_2\text{O}$  and  $\text{CH}_2\text{Cl}_2$

We regard the crystal as a cuboid whose edge lengths are  $a$ ,  $b$ ,  $c$ , for simplicity. Because the crystal is hydrophilic, it exhibits contact angles between  $0$  and  $90^\circ$  at the interface ( $\theta_1$ , viewed from  $a$  axis,  $\theta_2$  viewed from  $b$  axis)<sup>S2</sup>. For a static crystal, the vertical component of the surface tension equals to the gravity, so we get:

$$2*(\gamma_{\text{H}_2\text{O}} - \gamma_{\text{CH}_2\text{Cl}_2})*a*\cos\theta_1 + 2*(\gamma_{\text{H}_2\text{O}} - \gamma_{\text{CH}_2\text{Cl}_2})*b*\cos\theta_2 = \rho*a*b*c*g,$$

where  $\gamma_{\text{H}_2\text{O}}$  and  $\gamma_{\text{CH}_2\text{Cl}_2}$  are the surfaces tensions of water and dichloromethane, respectively,  $\rho$  is the mass density of the crystal,  $g$  is the gravity coefficient. The left side which stands for the total vertical component of the surface tension increases linearly with the crystal size, while the right side which stands for the gravity is proportional to the cube of the size.

At first, the gravity is very tiny and  $\theta_{1(2)}$  is nearly  $90^\circ$ . As the crystal size grows, the  $\theta_{1(2)}$  should also increase. Finally when  $\theta_{1(2)}$  approaches zero, namely,  $2*(\gamma_{\text{H}_2\text{O}} - \gamma_{\text{CH}_2\text{Cl}_2})*a + 2*(\gamma_{\text{H}_2\text{O}} - \gamma_{\text{CH}_2\text{Cl}_2})*b = \rho*a*b*c*g$ , the crystal can no longer maintain static at the interface and then falls to the bottom.

## Reference

S2 L. L. Schramm, *Emulsions, Foams, and Suspensions: Fundamentals and Applications*, Wiley-VCH Verlag GmbH & Co. KGaA, Weinheim, 2005.

### 3. Diffuse Reflectance Spectra of 1~4

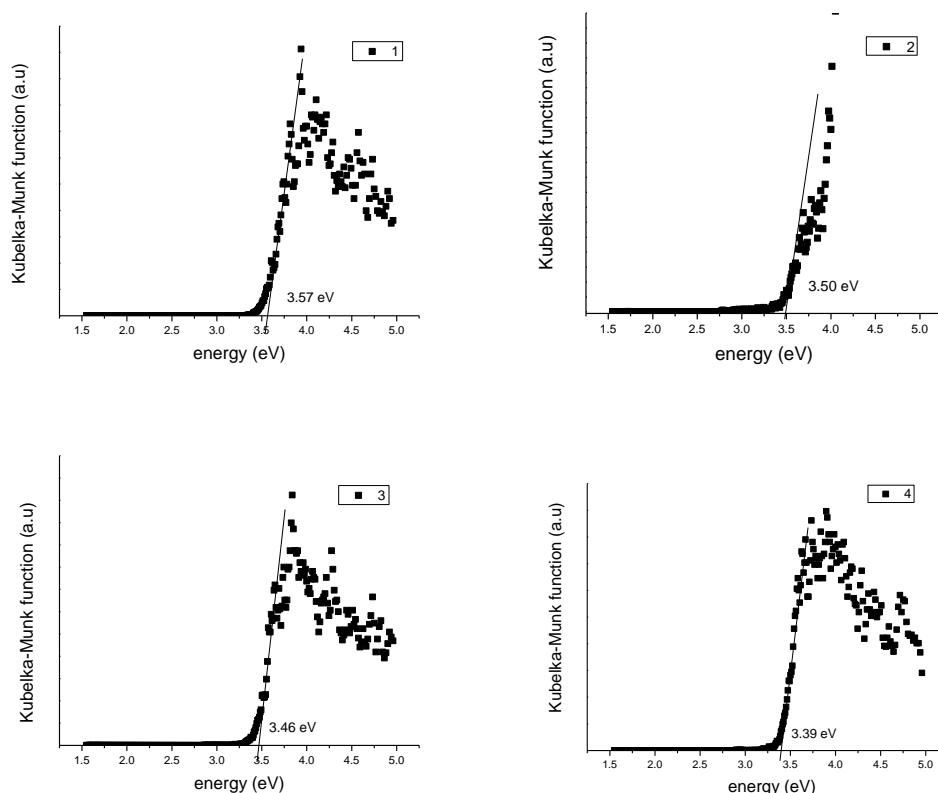

Fig S3 Diffuse reflectance spectra and band gap extrapolations of 1~4.

## 5 Crystal Structures of 1~4

### 1 Crystal Structure of $4[\text{Ag}_4\text{I}_8] \cdot 16[(\text{C}_2\text{H}_5)_3\text{N}(\text{C}_7\text{H}_6\text{Cl})] \cdot \text{CH}_2\text{Cl}_2$

The room temperature ( $295 \pm 2^\circ\text{K}$ ) single-crystal X-ray experiments were performed on a Rigaku RAXIS-RAPID diffractometer with monochromatized Mo  $\text{K}_\alpha$  radiation. Unit cell was obtained and refined by 48955 well centered reflections with  $3.0^\circ < \theta < 25.5^\circ$ . No decay was observed except the statistic fluctuation. Raw intensities were corrected for Lorentz and polarization effects, and for absorption by empirical method. Direct phase determination yielded the positions of all Ag and I atoms. The other non-hydrogen atoms were located in the successive Fourier syntheses. All non-hydrogen atoms were subjected to anisotropic refinement. The sample is a twin crystal. The disordered solvent molecule,  $\text{CH}_2\text{Cl}_2$ , was found in the hole. Its occupancy was fixed to be 0.5 in the final refinement according to the refinement for the occupancy before. All hydrogen atoms were generated geometrically with C-H bond distances of 0.93-0.97 Å according to criteria described in the SHELXTL manual (Bruker, 1997). They were included in the refinement with  $U_{\text{iso}}(\text{H}) = 1.2U_{\text{eq}}(\text{C})$  or  $1.5U_{\text{eq}}(\text{methyl C})$ . The final full-matrix least-square refinement on  $F^2$  converged with  $R1 = 0.0867$  and  $wR2 = 0.1897$  for 19314 observed reflections [ $I \geq 2\sigma(I)$ ]. The final difference electron density map shows no features. Details of crystal parameters, data collection and structure refinement are given in Table 1.

Data collection was controlled by Crystalclear program. Computations were performed using the SHELXTL NT ver. 5.10 program package (Bruker, 1997) on a IBM PC 586 computer. Analytic expressions of atomic scattering factors were employed, and anomalous dispersion corrections were incorporated (*International Tables for X-ray Crystallography*, 1989). Crystal drawing were produced with XP (Bruker, 1998).

### References

Bruker.(1997) SHELXTL. Structure Determination Programs, Version 5.10, Bruker AXS Inc.,6300 Enterprise Lane, Madison, WI 53719-1173, USA.

*International Tables for X-ray Crystallography*: (1989) Vol. C (Kluwer Academic Publishers, Dordrecht) Tables 4.2.6.8 and 6.1.1.4.

Table 1. Details of Data Collection, Processing and Structure Refinement

|                                                                                        |                                                                                                                          |                                                                                                         |
|----------------------------------------------------------------------------------------|--------------------------------------------------------------------------------------------------------------------------|---------------------------------------------------------------------------------------------------------|
| Sample code                                                                            | <b>I</b>                                                                                                                 |                                                                                                         |
| Molecular formula                                                                      | 4[Ag <sub>4</sub> I <sub>8</sub> ]·16[C <sub>13</sub> H <sub>21</sub> ClN]·CH <sub>2</sub> Cl <sub>2</sub>               |                                                                                                         |
| Molecular weight                                                                       | 9499.77                                                                                                                  |                                                                                                         |
| Color and habit                                                                        | colorless block                                                                                                          |                                                                                                         |
| Crystal size                                                                           | 0.05 × 0.05 × 0.05 mm                                                                                                    |                                                                                                         |
| Crystal system                                                                         | monoclinic                                                                                                               |                                                                                                         |
| Space group                                                                            | <i>Pc</i> (No. 7)                                                                                                        |                                                                                                         |
| Unit cell parameters                                                                   | $a = 12.263(3) \text{ \AA}$<br>$b = 24.775(5) \text{ \AA}$<br>$c = 24.888(5) \text{ \AA}$<br>$V = 7559(3) \text{ \AA}^3$ | $\alpha = 90.00^\circ$<br>$\beta = 91.51(3)^\circ$<br>$\gamma = 90.00^\circ$<br>$Z = 1$ $F(000) = 4458$ |
| Density (calcd)                                                                        | 2.087 g/cm <sup>3</sup>                                                                                                  |                                                                                                         |
| Diffractometer                                                                         | Rigaku RAXIS-RAPID                                                                                                       |                                                                                                         |
| Radiation                                                                              | graphite-monochromatized Mo K <sub>α</sub> , $\lambda = 0.71073 \text{ \AA}$                                             |                                                                                                         |
| Temperature                                                                            | 295±2K                                                                                                                   |                                                                                                         |
| Scan type                                                                              | $\omega$ -scan                                                                                                           |                                                                                                         |
| Data collection range                                                                  | -14 < <i>h</i> < 14, -30 < <i>k</i> < 29, -30 < <i>l</i> < 30; $\theta_{\max} = 25.5^\circ$                              |                                                                                                         |
| Reflections measured                                                                   | Total: 60557                                                                                                             | Unique ( <i>n</i> ): 26101 Observed [ $I \geq 2\sigma(I)$ ]: 19314                                      |
| Absorption coefficient                                                                 | 4.480 mm <sup>-1</sup>                                                                                                   |                                                                                                         |
| Minimum and maximum transmission                                                       | 1.000, 0.036                                                                                                             |                                                                                                         |
| No. of variables, <i>p</i>                                                             | 1326                                                                                                                     |                                                                                                         |
| Weighting scheme                                                                       | $w = \frac{1}{\sigma^2(F_o^2) + (0.001P)^2 + 5.0P}$                                                                      | $P = (F_o^2 + 2F_c^2)/3$                                                                                |
| $R1 = \frac{\sum   F_o  -  F_c  }{\sum  F_o }$ (for all reflections)                   | 0.1058                                                                                                                   | 0.0867 (for observed data)                                                                              |
| $wR2 = \sqrt{\frac{\sum [w(F_o^2 - F_c^2)^2]}{\sum w(F_o^2)^2}}$ (for all reflections) | 0.2046                                                                                                                   | 0.1897 (for observed data)                                                                              |
| Goof = $S = \sqrt{\frac{\sum [w(F_o^2 - F_c^2)^2]}{n - p}}$                            | 1.458                                                                                                                    |                                                                                                         |
| Largest and mean $\Delta/\sigma$                                                       | 0.018, 0.000                                                                                                             |                                                                                                         |
| Residual extrema in final difference map                                               | -2.036 to 2.864 e $\text{\AA}^{-3}$                                                                                      |                                                                                                         |

Table 2. Atomic coordinates and equivalent isotropic temperature factors\* ( $\text{\AA}^2$ )

| Atoms | <i>x</i>   | <i>y</i>    | <i>z</i>    | <i>U</i> <sub>eq.</sub> |
|-------|------------|-------------|-------------|-------------------------|
| I(1)  | 0.59169(5) | 0.53460(3)  | 0.22613(3)  | 0.05199(19)             |
| I(2)  | 0.23494(6) | 0.59373(3)  | 0.18194(3)  | 0.0665(2)               |
| I(3)  | 0.30202(6) | 0.40988(3)  | 0.22433(3)  | 0.0633(2)               |
| I(4)  | 0.32087(6) | 0.54501(3)  | 0.35895(3)  | 0.0580(2)               |
| I(5)  | 0.20518(6) | 0.36998(4)  | 0.39845(4)  | 0.0688(2)               |
| I(6)  | 0.57573(6) | 0.40454(3)  | 0.36013(3)  | 0.0583(2)               |
| I(7)  | 0.66652(8) | 0.35548(4)  | 0.18703(4)  | 0.0783(3)               |
| I(8)  | 0.66868(6) | 0.58365(3)  | 0.40793(3)  | 0.0630(2)               |
| I(9)  | 0.56522(6) | 1.03745(3)  | 0.33919(3)  | 0.0612(2)               |
| I(10) | 0.22477(7) | 1.09512(3)  | 0.38730(3)  | 0.0694(3)               |
| I(11) | 0.29433(6) | 0.90689(3)  | 0.34540(3)  | 0.0589(2)               |
| I(12) | 0.29584(6) | 1.03818(3)  | 0.21082(3)  | 0.0561(2)               |
| I(13) | 0.19485(8) | 0.86369(4)  | 0.16245(4)  | 0.0858(3)               |
| I(14) | 0.55434(7) | 0.89843(3)  | 0.21528(4)  | 0.0726(3)               |
| I(15) | 0.66006(7) | 0.85671(4)  | 0.39229(4)  | 0.0728(3)               |
| I(16) | 0.66230(8) | 1.06208(4)  | 0.15400(4)  | 0.0892(3)               |
| Ag(1) | 0.35420(8) | 0.52385(4)  | 0.24504(4)  | 0.0741(3)               |
| Ag(2) | 0.34543(8) | 0.43060(5)  | 0.33770(4)  | 0.0749(3)               |
| Ag(3) | 0.53396(9) | 0.42180(4)  | 0.24444(4)  | 0.0757(3)               |
| Ag(4) | 0.54623(8) | 0.51890(4)  | 0.33892(4)  | 0.0704(3)               |
| Ag(5) | 0.33382(8) | 1.02016(4)  | 0.32645(4)  | 0.0724(3)               |
| Ag(6) | 0.32746(9) | 0.92202(5)  | 0.23115(5)  | 0.0822(4)               |
| Ag(7) | 0.53052(9) | 0.92191(5)  | 0.32869(5)  | 0.0843(4)               |
| Ag(8) | 0.53032(9) | 1.01403(5)  | 0.22622(5)  | 0.0810(4)               |
| Cl(1) | 1.1799(4)  | 0.6096(2)   | 0.48167(19) | 0.1346(18)              |
| Cl(2) | 0.6670(4)  | 0.1608(2)   | 0.4126(3)   | 0.203(2)                |
| Cl(3) | 0.7829(5)  | 0.3112(3)   | 0.5768(2)   | 0.197(3)                |
| Cl(4) | -0.0517(4) | 0.1736(3)   | 0.1627(2)   | 0.170(2)                |
| Cl(5) | 0.9358(3)  | 0.40510(19) | 0.5091(2)   | 0.1134(16)              |
| Cl(6) | 0.1223(4)  | 1.22876(19) | 0.0515(3)   | 0.157(3)                |
| Cl(7) | 1.0972(5)  | 0.7207(3)   | 0.3707(3)   | 0.182(3)                |
| Cl(8) | 0.9693(5)  | 0.8787(2)   | 0.5124(3)   | 0.150(2)                |
| N(1)  | 0.7545(4)  | 0.7225(2)   | 0.5206(2)   | 0.052(3)                |
| N(2)  | 1.0997(4)  | 0.2215(2)   | 0.5041(2)   | 0.057(3)                |
| N(3)  | 0.4926(4)  | 0.28297(18) | 0.7687(2)   | 0.045(2)                |
| N(4)  | 0.4118(4)  | 0.22036(19) | 0.2573(2)   | 0.061(3)                |
| N(5)  | 0.4551(4)  | 0.4699(2)   | 0.53922(19) | 0.054(3)                |
| N(6)  | 0.3732(4)  | 1.0189(2)   | 0.03087(19) | 0.057(3)                |
| N(7)  | 0.9495(4)  | 0.5043(2)   | 0.3007(2)   | 0.073(3)                |
| N(8)  | 0.9419(4)  | 0.9813(2)   | 0.2887(2)   | 0.094(4)                |

(Table 2. continued)

| Atoms | <i>x</i>   | <i>y</i>  | <i>z</i>  | <i>U<sub>eq.</sub></i> |
|-------|------------|-----------|-----------|------------------------|
| C(1)  | 0.7876(8)  | 0.6671(2) | 0.5352(4) | 0.050(3)               |
| C(2)  | 0.9098(7)  | 0.6589(4) | 0.5505(3) | 0.061(3)               |
| C(3)  | 0.9426(9)  | 0.6625(5) | 0.6044(6) | 0.075(4)               |
| C(4)  | 1.0529(11) | 0.6516(6) | 0.6210(6) | 0.087(5)               |
| C(5)  | 1.1195(10) | 0.6331(5) | 0.5827(6) | 0.076(4)               |
| C(6)  | 1.0857(9)  | 0.6285(6) | 0.5303(5) | 0.072(4)               |
| C(7)  | 0.9838(7)  | 0.6397(4) | 0.5138(4) | 0.058(3)               |
| C(8)  | 0.8253(7)  | 0.7484(3) | 0.4811(2) | 0.061(3)               |
| C(9)  | 0.8242(12) | 0.7229(4) | 0.4246(3) | 0.085(5)               |
| C(10) | 0.7604(9)  | 0.7542(3) | 0.5705(3) | 0.074(4)               |
| C(11) | 0.7098(11) | 0.8112(3) | 0.5664(6) | 0.114(6)               |
| C(12) | 0.6426(4)  | 0.7207(4) | 0.4979(3) | 0.062(4)               |
| C(13) | 0.5557(8)  | 0.7064(7) | 0.5393(5) | 0.128(7)               |
| C(14) | 1.0666(11) | 0.2247(5) | 0.4465(3) | 0.079(4)               |
| C(15) | 0.9483(10) | 0.2370(5) | 0.4335(5) | 0.070(4)               |
| C(16) | 0.9163(9)  | 0.2899(5) | 0.4244(5) | 0.065(4)               |
| C(17) | 0.8132(11) | 0.3046(5) | 0.4134(5) | 0.074(4)               |
| C(18) | 0.7319(12) | 0.2654(6) | 0.4100(6) | 0.090(5)               |
| C(19) | 0.7646(12) | 0.2089(5) | 0.4193(6) | 0.086(5)               |
| C(20) | 0.8762(10) | 0.1978(6) | 0.4279(6) | 0.089(4)               |
| C(21) | 1.0859(9)  | 0.2763(3) | 0.5262(3) | 0.073(4)               |
| C(22) | 1.1326(13) | 0.2861(5) | 0.5830(3) | 0.108(6)               |
| C(23) | 1.0281(7)  | 0.1848(2) | 0.5334(4) | 0.063(4)               |
| C(24) | 1.0339(11) | 0.1237(3) | 0.5213(6) | 0.077(4)               |
| C(25) | 1.2142(4)  | 0.2035(3) | 0.5076(4) | 0.058(3)               |
| C(26) | 1.3052(7)  | 0.2393(4) | 0.4860(6) | 0.108(5)               |
| C(27) | 0.4854(8)  | 0.3150(3) | 0.7192(3) | 0.044(2)               |
| C(28) | 0.5221(9)  | 0.2899(4) | 0.6690(5) | 0.059(3)               |
| C(29) | 0.4691(9)  | 0.2487(4) | 0.6419(3) | 0.075(4)               |
| C(30) | 0.5080(14) | 0.2267(6) | 0.5949(4) | 0.136(8)               |
| C(31) | 0.6100(9)  | 0.2461(4) | 0.5753(5) | 0.099(4)               |
| C(32) | 0.6692(10) | 0.2855(4) | 0.6036(5) | 0.082(4)               |
| C(33) | 0.6212(10) | 0.3083(5) | 0.6482(5) | 0.075(4)               |
| C(34) | 0.4163(5)  | 0.2372(3) | 0.7684(5) | 0.068(4)               |
| C(35) | 0.2943(6)  | 0.2520(6) | 0.7633(6) | 0.095(5)               |
| C(36) | 0.6019(4)  | 0.2596(3) | 0.7779(5) | 0.068(3)               |
| C(37) | 0.6945(7)  | 0.3010(4) | 0.7865(5) | 0.093(5)               |
| C(38) | 0.4687(11) | 0.3220(3) | 0.8116(2) | 0.075(4)               |
| C(39) | 0.4635(13) | 0.2991(5) | 0.8689(3) | 0.105(5)               |

(Table 2. continued)

| Atoms | <i>x</i>    | <i>y</i>  | <i>z</i>   | <i>U<sub>eq.</sub></i> |
|-------|-------------|-----------|------------|------------------------|
| C(40) | 0.3183(6)   | 0.1859(4) | 0.2695(5)  | 0.062(3)               |
| C(41) | 0.1995(9)   | 0.2084(3) | 0.2592(4)  | 0.075(4)               |
| C(42) | 0.1347(14)  | 0.1891(5) | 0.2180(6)  | 0.102(6)               |
| C(43) | 0.0293(13)  | 0.2083(7) | 0.2117(8)  | 0.121(6)               |
| C(44) | -0.0090(13) | 0.2482(8) | 0.2444(8)  | 0.113(6)               |
| C(45) | 0.0587(14)  | 0.2680(7) | 0.2829(7)  | 0.104(6)               |
| C(46) | 0.1610(9)   | 0.2493(4) | 0.2917(5)  | 0.085(4)               |
| C(47) | 0.4251(11)  | 0.2673(3) | 0.2934(2)  | 0.076(4)               |
| C(48) | 0.4283(14)  | 0.2513(5) | 0.3532(3)  | 0.099(5)               |
| C(49) | 0.5008(5)   | 0.1811(3) | 0.2630(6)  | 0.091(5)               |
| C(50) | 0.6164(6)   | 0.2042(6) | 0.2558(8)  | 0.126(8)               |
| C(51) | 0.4106(11)  | 0.2416(4) | 0.2022(2)  | 0.102(6)               |
| C(52) | 0.4032(18)  | 0.2029(5) | 0.1539(4)  | 0.160(9)               |
| C(53) | 0.5455(5)   | 0.4898(4) | 0.5070(3)  | 0.045(3)               |
| C(54) | 0.6592(9)   | 0.4852(5) | 0.5326(5)  | 0.062(4)               |
| C(55) | 0.7389(10)  | 0.4501(5) | 0.5135(5)  | 0.068(4)               |
| C(56) | 0.8442(9)   | 0.4493(5) | 0.5313(5)  | 0.064(4)               |
| C(57) | 0.8773(11)  | 0.4886(6) | 0.5649(6)  | 0.089(5)               |
| C(58) | 0.8025(9)   | 0.5249(5) | 0.5872(6)  | 0.077(4)               |
| C(59) | 0.6931(10)  | 0.5245(4) | 0.5686(5)  | 0.070(4)               |
| C(60) | 0.4712(10)  | 0.4151(2) | 0.5607(3)  | 0.073(4)               |
| C(61) | 0.4788(12)  | 0.3716(4) | 0.5173(4)  | 0.102(6)               |
| C(62) | 0.4385(9)   | 0.5051(2) | 0.5857(3)  | 0.067(4)               |
| C(63) | 0.4206(12)  | 0.5658(3) | 0.5758(6)  | 0.095(5)               |
| C(64) | 0.3558(4)   | 0.4738(5) | 0.5047(3)  | 0.069(4)               |
| C(65) | 0.2478(7)   | 0.4590(6) | 0.5315(5)  | 0.100(6)               |
| C(66) | 0.3879(9)   | 1.0701(3) | 0.0609(4)  | 0.054(3)               |
| C(67) | 0.3570(8)   | 1.1207(4) | 0.0321(4)  | 0.049(3)               |
| C(68) | 0.2642(9)   | 1.1471(5) | 0.0506(5)  | 0.065(4)               |
| C(69) | 0.2333(12)  | 1.1949(5) | 0.0285(7)  | 0.104(6)               |
| C(70) | 0.2903(15)  | 1.2126(5) | -0.0145(7) | 0.116(6)               |
| C(71) | 0.3906(15)  | 1.1912(7) | -0.0301(7) | 0.133(7)               |
| C(72) | 0.4165(11)  | 1.1454(5) | -0.0071(5) | 0.070(4)               |
| C(73) | 0.2606(4)   | 1.0124(4) | 0.0098(3)  | 0.061(3)               |
| C(74) | 0.1747(7)   | 1.0092(5) | 0.0536(4)  | 0.075(4)               |
| C(75) | 0.4034(9)   | 0.9748(2) | 0.0680(3)  | 0.061(3)               |
| C(76) | 0.3978(13)  | 0.9159(3) | 0.0478(5)  | 0.084(5)               |
| C(77) | 0.4393(5)   | 1.0180(4) | -0.0183(3) | 0.058(3)               |
| C(78) | 0.5643(6)   | 1.0197(5) | -0.0102(5) | 0.084(4)               |



(Table 2. continued )

| Atoms  | <i>x</i>   | <i>y</i>  | <i>z</i>   | $U_{eq}$  |
|--------|------------|-----------|------------|-----------|
| C(79)  | 0.8819(7)  | 0.5528(3) | 0.2978(6)  | 0.091(5)  |
| C(80)  | 0.9404(11) | 0.6089(5) | 0.2892(3)  | 0.091(4)  |
| C(81)  | 0.9859(8)  | 0.6362(3) | 0.3330(6)  | 0.094(6)  |
| C(82)  | 1.0382(10) | 0.6837(4) | 0.3194(7)  | 0.108(6)  |
| C(83)  | 1.0250(13) | 0.7087(8) | 0.2693(10) | 0.142(9)  |
| C(84)  | 0.9769(12) | 0.6828(3) | 0.2267(8)  | 0.129(8)  |
| C(85)  | 0.9340(11) | 0.6321(4) | 0.2382(4)  | 0.121(7)  |
| C(86)  | 1.0202(7)  | 0.5055(7) | 0.3494(2)  | 0.119(6)  |
| C(87)  | 0.9659(10) | 0.5057(8) | 0.4044(3)  | 0.144(8)  |
| C(88)  | 0.8659(6)  | 0.4630(2) | 0.3071(7)  | 0.115(6)  |
| C(89)  | 0.9123(12) | 0.4055(3) | 0.3042(9)  | 0.176(9)  |
| C(90)  | 1.0277(6)  | 0.4965(6) | 0.2576(2)  | 0.090(5)  |
| C(91)  | 0.9705(10) | 0.4897(7) | 0.2021(3)  | 0.110(6)  |
| C(92)  | 1.0078(8)  | 0.9872(5) | 0.3382(4)  | 0.137(9)  |
| C(93)  | 0.9562(9)  | 0.9843(7) | 0.3904(7)  | 0.091(5)  |
| C(94)  | 0.9803(11) | 0.9371(6) | 0.4269(7)  | 0.090(5)  |
| C(95)  | 0.9312(13) | 0.9342(7) | 0.4743(7)  | 0.121(5)  |
| C(96)  | 0.8605(13) | 0.9674(9) | 0.5007(9)  | 0.145(9)  |
| C(97)  | 0.8421(10) | 1.0122(7) | 0.4659(3)  | 0.117(6)  |
| C(98)  | 0.8867(10) | 1.0210(8) | 0.4157(4)  | 0.132(8)  |
| C(99)  | 0.8814(7)  | 0.9311(2) | 0.2954(6)  | 0.117(6)  |
| C(100) | 0.9495(11) | 0.8795(4) | 0.2886(9)  | 0.153(9)  |
| C(101) | 1.0169(6)  | 0.9877(6) | 0.2445(2)  | 0.097(6)  |
| C(102) | 0.9641(10) | 0.9833(8) | 0.1878(3)  | 0.157(8)  |
| C(103) | 0.8548(6)  | 1.0215(2) | 0.2860(8)  | 0.137(8)  |
| C(104) | 0.9002(14) | 1.0794(4) | 0.2872(10) | 0.177(12) |
| Cl(9)  | 0.7250(6)  | 0.1192(3) | 0.5486(3)  | 0.116(3)  |
| Cl(10) | 0.8343(7)  | 0.1600(3) | 0.6437(3)  | 0.131(4)  |
| C(105) | 0.7842(12) | 0.1049(4) | 0.6099(4)  | 0.219(14) |

\* $U_{eq}$  defined as one third of the trace of the orthogonalized **U** tensor.

Table 3. Bond lengths (Å) and bond angles (°)

|             |            |             |           |
|-------------|------------|-------------|-----------|
| I(1)-Ag(4)  | 2.9024(14) | N(1)-C(12)  | 1.470(7)  |
| I(1)-Ag(3)  | 2.9216(14) | N(1)-C(1)   | 1.474(7)  |
| I(1)-Ag(1)  | 2.9743(14) | N(1)-C(8)   | 1.476(7)  |
| I(2)-Ag(1)  | 2.7352(14) | N(2)-C(23)  | 1.470(7)  |
| I(3)-Ag(3)  | 2.8900(14) | N(2)-C(25)  | 1.473(7)  |
| I(3)-Ag(2)  | 2.9033(15) | N(2)-C(21)  | 1.476(7)  |
| I(3)-Ag(1)  | 2.9378(15) | N(2)-C(14)  | 1.484(7)  |
| I(4)-Ag(4)  | 2.8944(13) | N(3)-C(27)  | 1.467(7)  |
| I(4)-Ag(2)  | 2.9005(15) | N(3)-C(34)  | 1.470(7)  |
| I(4)-Ag(1)  | 2.9224(15) | N(3)-C(36)  | 1.472(7)  |
| I(5)-Ag(2)  | 2.7636(15) | N(3)-C(38)  | 1.475(7)  |
| I(6)-Ag(4)  | 2.9031(14) | N(4)-C(49)  | 1.466(7)  |
| I(6)-Ag(2)  | 2.9362(14) | N(4)-C(40)  | 1.467(7)  |
| I(6)-Ag(3)  | 2.9425(15) | N(4)-C(51)  | 1.468(7)  |
| I(7)-Ag(3)  | 2.7398(15) | N(4)-C(47)  | 1.474(7)  |
| I(8)-Ag(4)  | 2.7645(14) | N(5)-C(62)  | 1.468(7)  |
| I(9)-Ag(5)  | 2.8790(14) | N(5)-C(53)  | 1.470(7)  |
| I(9)-Ag(8)  | 2.8914(15) | N(5)-C(60)  | 1.471(7)  |
| I(9)-Ag(7)  | 2.9046(16) | N(5)-C(64)  | 1.475(7)  |
| I(10)-Ag(5) | 2.7637(14) | N(6)-C(75)  | 1.472(7)  |
| I(11)-Ag(5) | 2.8886(14) | N(6)-C(73)  | 1.473(7)  |
| I(11)-Ag(6) | 2.9073(15) | N(6)-C(66)  | 1.483(7)  |
| I(11)-Ag(7) | 2.9605(15) | N(6)-C(77)  | 1.485(7)  |
| I(12)-Ag(5) | 2.9371(14) | N(7)-C(88)  | 1.460(7)  |
| I(12)-Ag(6) | 2.9460(15) | N(7)-C(79)  | 1.462(8)  |
| I(12)-Ag(8) | 2.9521(15) | N(7)-C(86)  | 1.470(7)  |
| I(13)-Ag(6) | 2.7403(16) | N(7)-C(90)  | 1.471(7)  |
| I(14)-Ag(6) | 2.8803(16) | N(8)-C(103) | 1.460(7)  |
| I(14)-Ag(8) | 2.8927(15) | N(8)-C(101) | 1.461(7)  |
| I(14)-Ag(7) | 2.9043(16) | N(8)-C(99)  | 1.462(7)  |
| I(15)-Ag(7) | 2.7396(16) | N(8)-C(92)  | 1.463(8)  |
| I(16)-Ag(8) | 2.7243(16) | C(1)-C(2)   | 1.550(13) |
| Cl(1)-C(6)  | 1.758(13)  | C(2)-C(7)   | 1.389(8)  |
| Cl(2)-C(19) | 1.693(14)  | C(2)-C(3)   | 1.391(16) |
| Cl(3)-C(32) | 1.687(14)  | C(3)-C(4)   | 1.429(17) |
| Cl(4)-C(43) | 1.774(18)  | C(4)-C(5)   | 1.352(19) |
| Cl(5)-C(56) | 1.673(12)  | C(5)-C(6)   | 1.363(18) |
| Cl(6)-C(69) | 1.711(15)  | C(6)-C(7)   | 1.334(14) |
| Cl(7)-C(82) | 1.717(17)  | C(8)-C(9)   | 1.541(8)  |
| Cl(8)-C(95) | 1.728(17)  | C(10)-C(11) | 1.543(8)  |
| N(1)-C(10)  | 1.470(7)   | C(12)-C(13) | 1.542(8)  |

(Table 3. continued)

|                  |           |                  |           |
|------------------|-----------|------------------|-----------|
| C(14)-C(15)      | 1.508(17) | C(58)-C(59)      | 1.407(17) |
| C(15)-C(20)      | 1.319(17) | C(60)-C(61)      | 1.531(8)  |
| C(15)-C(16)      | 1.385(17) | C(62)-C(63)      | 1.538(7)  |
| C(16)-C(17)      | 1.337(17) | C(64)-C(65)      | 1.544(8)  |
| C(17)-C(18)      | 1.392(18) | C(66)-C(67)      | 1.487(13) |
| C(18)-C(19)      | 1.474(18) | C(67)-C(72)      | 1.378(16) |
| C(19)-C(20)      | 1.407(18) | C(67)-C(68)      | 1.401(15) |
| C(21)-C(22)      | 1.531(8)  | C(68)-C(69)      | 1.357(18) |
| C(23)-C(24)      | 1.546(7)  | C(69)-C(70)      | 1.37(2)   |
| C(25)-C(26)      | 1.534(8)  | C(70)-C(71)      | 1.40(2)   |
| C(27)-C(28)      | 1.475(14) | C(71)-C(72)      | 1.31(2)   |
| C(28)-C(29)      | 1.377(14) | C(73)-C(74)      | 1.538(8)  |
| C(28)-C(33)      | 1.408(17) | C(75)-C(76)      | 1.544(7)  |
| C(29)-C(30)      | 1.388(9)  | C(77)-C(78)      | 1.541(7)  |
| C(30)-C(31)      | 1.44(2)   | C(79)-C(80)      | 1.579(15) |
| C(31)-C(32)      | 1.395(9)  | C(80)-C(81)      | 1.387(16) |
| C(32)-C(33)      | 1.390(17) | C(80)-C(85)      | 1.394(8)  |
| C(34)-C(35)      | 1.542(8)  | C(81)-C(82)      | 1.386(9)  |
| C(36)-C(37)      | 1.540(8)  | C(82)-C(83)      | 1.40(3)   |
| C(38)-C(39)      | 1.537(8)  | C(83)-C(84)      | 1.36(3)   |
| C(40)-C(41)      | 1.575(14) | C(84)-C(85)      | 1.394(9)  |
| C(41)-C(42)      | 1.367(17) | C(86)-C(87)      | 1.538(8)  |
| C(41)-C(46)      | 1.387(8)  | C(88)-C(89)      | 1.537(8)  |
| C(42)-C(43)      | 1.38(2)   | C(90)-C(91)      | 1.541(8)  |
| C(43)-C(44)      | 1.37(3)   | C(92)-C(93)      | 1.461(19) |
| C(44)-C(45)      | 1.34(2)   | C(93)-C(98)      | 1.41(2)   |
| C(45)-C(46)      | 1.35(2)   | C(93)-C(94)      | 1.51(2)   |
| C(47)-C(48)      | 1.540(8)  | C(94)-C(95)      | 1.34(2)   |
| C(49)-C(50)      | 1.544(8)  | C(95)-C(96)      | 1.37(3)   |
| C(51)-C(52)      | 1.538(8)  | C(96)-C(97)      | 1.42(3)   |
| C(53)-C(54)      | 1.522(14) | C(97)-C(98)      | 1.393(9)  |
| C(54)-C(59)      | 1.381(16) | C(99)-C(100)     | 1.538(9)  |
| C(54)-C(55)      | 1.401(16) | C(101)-C(102)    | 1.541(8)  |
| C(55)-C(56)      | 1.354(17) | C(103)-C(104)    | 1.539(8)  |
| C(56)-C(57)      | 1.340(19) | Cl(10)-C(105)    | 1.711(8)  |
| C(57)-C(58)      | 1.411(19) |                  |           |
| Ag(4)-I(1)-Ag(3) | 70.58(3)  | Ag(3)-I(3)-Ag(1) | 70.28(3)  |
| Ag(4)-I(1)-Ag(1) | 67.73(4)  | Ag(2)-I(3)-Ag(1) | 68.04(4)  |
| Ag(3)-I(1)-Ag(1) | 69.35(3)  | Ag(4)-I(4)-Ag(2) | 69.26(3)  |
| Ag(3)-I(3)-Ag(2) | 70.08(4)  | Ag(4)-I(4)-Ag(1) | 68.54(4)  |

(Table 3. continued)

|                   |           |                   |           |
|-------------------|-----------|-------------------|-----------|
| Ag(2)-I(4)-Ag(1)  | 68.28(4)  | I(10)-Ag(5)-I(9)  | 109.24(5) |
| Ag(4)-I(6)-Ag(2)  | 68.66(3)  | I(10)-Ag(5)-I(11) | 118.53(5) |
| Ag(4)-I(6)-Ag(3)  | 70.27(3)  | I(9)-Ag(5)-I(11)  | 107.19(4) |
| Ag(2)-I(6)-Ag(3)  | 68.92(4)  | I(10)-Ag(5)-I(12) | 111.61(4) |
| Ag(5)-I(9)-Ag(8)  | 75.10(5)  | I(9)-Ag(5)-I(12)  | 102.45(5) |
| Ag(5)-I(9)-Ag(7)  | 72.65(4)  | I(11)-Ag(5)-I(12) | 106.55(4) |
| Ag(8)-I(9)-Ag(7)  | 72.38(4)  | I(13)-Ag(6)-I(14) | 111.53(5) |
| Ag(5)-I(11)-Ag(6) | 71.74(4)  | I(13)-Ag(6)-I(11) | 116.51(5) |
| Ag(5)-I(11)-Ag(7) | 71.70(4)  | I(14)-Ag(6)-I(11) | 105.57(5) |
| Ag(6)-I(11)-Ag(7) | 71.57(5)  | I(13)-Ag(6)-I(12) | 109.56(5) |
| Ag(5)-I(12)-Ag(6) | 70.52(3)  | I(14)-Ag(6)-I(12) | 107.33(4) |
| Ag(5)-I(12)-Ag(8) | 73.34(4)  | I(11)-Ag(6)-I(12) | 105.82(4) |
| Ag(6)-I(12)-Ag(8) | 69.90(4)  | I(15)-Ag(7)-I(14) | 111.82(5) |
| Ag(6)-I(14)-Ag(8) | 71.65(4)  | I(15)-Ag(7)-I(9)  | 116.60(5) |
| Ag(6)-I(14)-Ag(7) | 72.77(5)  | I(14)-Ag(7)-I(9)  | 105.46(5) |
| Ag(8)-I(14)-Ag(7) | 72.36(4)  | I(15)-Ag(7)-I(11) | 113.53(5) |
| I(2)-Ag(1)-I(4)   | 110.92(5) | I(14)-Ag(7)-I(11) | 103.61(5) |
| I(2)-Ag(1)-I(3)   | 113.39(5) | I(9)-Ag(7)-I(11)  | 104.64(4) |
| I(4)-Ag(1)-I(3)   | 107.89(4) | I(16)-Ag(8)-I(9)  | 118.60(5) |
| I(2)-Ag(1)-I(1)   | 111.31(5) | I(16)-Ag(8)-I(14) | 107.87(5) |
| I(4)-Ag(1)-I(1)   | 107.46(5) | I(9)-Ag(8)-I(14)  | 106.11(4) |
| I(3)-Ag(1)-I(1)   | 105.54(4) | I(16)-Ag(8)-I(12) | 114.79(5) |
| I(5)-Ag(2)-I(4)   | 111.24(5) | I(9)-Ag(8)-I(12)  | 101.78(5) |
| I(5)-Ag(2)-I(3)   | 109.56(5) | I(14)-Ag(8)-I(12) | 106.84(4) |
| I(4)-Ag(2)-I(3)   | 109.44(4) | C(10)-N(1)-C(12)  | 111.4(6)  |
| I(5)-Ag(2)-I(6)   | 112.69(5) | C(10)-N(1)-C(1)   | 106.4(6)  |
| I(4)-Ag(2)-I(6)   | 106.52(4) | C(12)-N(1)-C(1)   | 108.4(6)  |
| I(3)-Ag(2)-I(6)   | 107.26(5) | C(10)-N(1)-C(8)   | 108.3(6)  |
| I(7)-Ag(3)-I(3)   | 116.31(5) | C(12)-N(1)-C(8)   | 108.4(6)  |
| I(7)-Ag(3)-I(1)   | 110.04(5) | C(1)-N(1)-C(8)    | 114.0(6)  |
| I(3)-Ag(3)-I(1)   | 108.19(4) | C(23)-N(2)-C(25)  | 111.4(6)  |
| I(7)-Ag(3)-I(6)   | 109.44(5) | C(23)-N(2)-C(21)  | 107.9(6)  |
| I(3)-Ag(3)-I(6)   | 107.44(5) | C(25)-N(2)-C(21)  | 112.0(7)  |
| I(1)-Ag(3)-I(6)   | 104.78(4) | C(23)-N(2)-C(14)  | 111.1(7)  |
| I(8)-Ag(4)-I(4)   | 105.59(4) | C(25)-N(2)-C(14)  | 108.0(7)  |
| I(8)-Ag(4)-I(1)   | 114.08(4) | C(21)-N(2)-C(14)  | 106.3(6)  |
| I(4)-Ag(4)-I(1)   | 110.20(5) | C(27)-N(3)-C(34)  | 112.9(7)  |
| I(8)-Ag(4)-I(6)   | 112.97(4) | C(27)-N(3)-C(36)  | 112.2(7)  |
| I(4)-Ag(4)-I(6)   | 107.56(4) | C(34)-N(3)-C(36)  | 105.9(5)  |
| I(1)-Ag(4)-I(6)   | 106.29(4) | C(27)-N(3)-C(38)  | 104.1(5)  |

(Table 3. continued)

|                    |           |                   |           |
|--------------------|-----------|-------------------|-----------|
| C(34)-N(3)-C(38)   | 111.7(7)  | C(7)-C(6)-Cl(1)   | 118.2(9)  |
| C(36)-N(3)-C(38)   | 110.1(7)  | C(5)-C(6)-Cl(1)   | 119.5(9)  |
| C(49)-N(4)-C(40)   | 100.2(5)  | C(6)-C(7)-C(2)    | 119.5(10) |
| C(49)-N(4)-C(51)   | 108.5(8)  | N(1)-C(8)-C(9)    | 116.0(7)  |
| C(40)-N(4)-C(51)   | 114.4(8)  | N(1)-C(10)-C(11)  | 115.0(7)  |
| C(49)-N(4)-C(47)   | 113.2(7)  | N(1)-C(12)-C(13)  | 113.9(7)  |
| C(40)-N(4)-C(47)   | 114.0(7)  | N(2)-C(14)-C(15)  | 117.1(9)  |
| C(51)-N(4)-C(47)   | 106.5(5)  | C(20)-C(15)-C(16) | 119.6(11) |
| C(62)-N(5)-C(53)   | 110.7(6)  | C(20)-C(15)-C(14) | 120.8(11) |
| C(62)-N(5)-C(60)   | 106.4(5)  | C(16)-C(15)-C(14) | 119.5(11) |
| C(53)-N(5)-C(60)   | 114.3(7)  | C(17)-C(16)-C(15) | 123.6(12) |
| C(62)-N(5)-C(64)   | 106.9(7)  | C(16)-C(17)-C(18) | 119.7(12) |
| C(53)-N(5)-C(64)   | 106.5(5)  | C(17)-C(18)-C(19) | 117.5(12) |
| C(60)-N(5)-C(64)   | 111.9(7)  | C(20)-C(19)-C(18) | 118.0(12) |
| C(75)-N(6)-C(73)   | 111.2(7)  | C(20)-C(19)-Cl(2) | 124.1(10) |
| C(75)-N(6)-C(66)   | 107.1(5)  | C(18)-C(19)-Cl(2) | 117.6(11) |
| C(73)-N(6)-C(66)   | 111.9(7)  | C(15)-C(20)-C(19) | 121.2(12) |
| C(75)-N(6)-C(77)   | 111.9(6)  | N(2)-C(21)-C(22)  | 116.5(7)  |
| C(73)-N(6)-C(77)   | 103.4(5)  | N(2)-C(23)-C(24)  | 118.5(7)  |
| C(66)-N(6)-C(77)   | 111.5(7)  | N(2)-C(25)-C(26)  | 120.4(7)  |
| C(88)-N(7)-C(79)   | 100.5(6)  | N(3)-C(27)-C(28)  | 118.0(7)  |
| C(88)-N(7)-C(86)   | 109.0(9)  | C(29)-C(28)-C(33) | 117.4(11) |
| C(79)-N(7)-C(86)   | 110.2(9)  | C(29)-C(28)-C(27) | 125.1(10) |
| C(88)-N(7)-C(90)   | 117.4(8)  | C(33)-C(28)-C(27) | 117.4(10) |
| C(79)-N(7)-C(90)   | 116.8(8)  | C(28)-C(29)-C(30) | 122.4(12) |
| C(86)-N(7)-C(90)   | 102.8(5)  | C(29)-C(30)-C(31) | 118.5(12) |
| C(103)-N(8)-C(101) | 111.5(10) | C(32)-C(31)-C(30) | 120.5(11) |
| C(103)-N(8)-C(99)  | 102.3(5)  | C(33)-C(32)-C(31) | 117.5(12) |
| C(101)-N(8)-C(99)  | 120.7(9)  | C(33)-C(32)-Cl(3) | 122.2(9)  |
| C(103)-N(8)-C(92)  | 111.0(10) | C(31)-C(32)-Cl(3) | 119.3(10) |
| C(101)-N(8)-C(92)  | 106.2(6)  | C(32)-C(33)-C(28) | 123.4(12) |
| C(99)-N(8)-C(92)   | 105.0(8)  | N(3)-C(34)-C(35)  | 115.7(7)  |
| N(1)-C(1)-C(2)     | 116.1(7)  | N(3)-C(36)-C(37)  | 115.1(6)  |
| C(7)-C(2)-C(3)     | 118.6(9)  | N(3)-C(38)-C(39)  | 116.3(7)  |
| C(7)-C(2)-C(1)     | 121.8(8)  | N(4)-C(40)-C(41)  | 119.1(7)  |
| C(3)-C(2)-C(1)     | 118.8(8)  | C(42)-C(41)-C(46) | 119.6(12) |
| C(2)-C(3)-C(4)     | 120.9(12) | C(42)-C(41)-C(40) | 121.0(10) |
| C(5)-C(4)-C(3)     | 116.4(13) | C(46)-C(41)-C(40) | 119.4(10) |
| C(4)-C(5)-C(6)     | 121.9(12) | C(41)-C(42)-C(43) | 119.2(14) |
| C(7)-C(6)-C(5)     | 122.3(11) | C(44)-C(43)-C(42) | 121.0(16) |

(Table 3. continued)

|                   |           |                     |           |
|-------------------|-----------|---------------------|-----------|
| C(44)-C(43)-Cl(4) | 124.2(13) | N(6)-C(73)-C(74)    | 114.0(6)  |
| C(42)-C(43)-Cl(4) | 114.6(13) | N(6)-C(75)-C(76)    | 119.2(7)  |
| C(45)-C(44)-C(43) | 118.1(16) | N(6)-C(77)-C(78)    | 117.1(7)  |
| C(44)-C(45)-C(46) | 123.0(16) | N(7)-C(79)-C(80)    | 118.1(8)  |
| C(45)-C(46)-C(41) | 119.0(12) | C(81)-C(80)-C(85)   | 121.6(11) |
| N(4)-C(47)-C(48)  | 112.7(7)  | C(81)-C(80)-C(79)   | 119.9(9)  |
| N(4)-C(49)-C(50)  | 115.2(7)  | C(85)-C(80)-C(79)   | 118.1(10) |
| N(4)-C(51)-C(52)  | 120.4(8)  | C(82)-C(81)-C(80)   | 113.7(13) |
| N(5)-C(53)-C(54)  | 116.3(8)  | C(81)-C(82)-C(83)   | 123.4(16) |
| C(59)-C(54)-C(55) | 117.3(11) | C(81)-C(82)-Cl(7)   | 117.4(13) |
| C(59)-C(54)-C(53) | 118.3(10) | C(83)-C(82)-Cl(7)   | 117.6(10) |
| C(55)-C(54)-C(53) | 122.9(11) | C(84)-C(83)-C(82)   | 121.5(17) |
| C(56)-C(55)-C(54) | 124.4(12) | C(83)-C(84)-C(85)   | 115.1(17) |
| C(57)-C(56)-C(55) | 117.7(11) | C(84)-C(85)-C(80)   | 123.1(13) |
| C(57)-C(56)-Cl(5) | 119.1(10) | N(7)-C(86)-C(87)    | 118.3(7)  |
| C(55)-C(56)-Cl(5) | 123.0(10) | N(7)-C(88)-C(89)    | 112.5(8)  |
| C(56)-C(57)-C(58) | 121.3(12) | N(7)-C(90)-C(91)    | 112.2(7)  |
| C(59)-C(58)-C(57) | 119.4(12) | C(93)-C(92)-N(8)    | 120.1(9)  |
| C(54)-C(59)-C(58) | 119.1(11) | C(98)-C(93)-C(92)   | 130.4(14) |
| N(5)-C(60)-C(61)  | 113.8(6)  | C(98)-C(93)-C(94)   | 110.1(13) |
| N(5)-C(62)-C(63)  | 118.4(7)  | C(92)-C(93)-C(94)   | 119.5(13) |
| N(5)-C(64)-C(65)  | 115.9(7)  | C(95)-C(94)-C(93)   | 119.1(14) |
| N(6)-C(66)-C(67)  | 117.0(7)  | C(94)-C(95)-C(96)   | 133.9(18) |
| C(72)-C(67)-C(68) | 118.5(11) | C(94)-C(95)-Cl(8)   | 113.8(14) |
| C(72)-C(67)-C(66) | 125.6(10) | C(96)-C(95)-Cl(8)   | 112.3(15) |
| C(68)-C(67)-C(66) | 115.7(10) | C(95)-C(96)-C(97)   | 105.5(18) |
| C(69)-C(68)-C(67) | 119.6(12) | C(98)-C(97)-C(96)   | 127.4(16) |
| C(68)-C(69)-C(70) | 117.1(13) | C(97)-C(98)-C(93)   | 123.9(16) |
| C(68)-C(69)-Cl(6) | 120.5(13) | N(8)-C(99)-C(100)   | 114.6(8)  |
| C(70)-C(69)-Cl(6) | 122.2(12) | N(8)-C(101)-C(102)  | 115.1(7)  |
| C(69)-C(70)-C(71) | 124.5(14) | N(8)-C(103)-C(104)  | 111.8(8)  |
| C(72)-C(71)-C(70) | 114.3(15) | Cl(9)-C(105)-Cl(10) | 114.3(7)  |
| C(71)-C(72)-C(67) | 124.7(14) |                     |           |

## 2 Crystal Structure of $[\text{Ag}_4\text{I}_8]\cdot 4[(\text{C}_2\text{H}_5)_3(\text{C}_7\text{H}_7)\text{N}]$

The room temperature ( $295\pm 1^\circ\text{K}$ ) single-crystal X-ray experiments were performed on a Rigaku RAXIS-RAPID diffractometer equipped with graphite monochromatized Mo  $\text{K}_\alpha$  radiation. Unit cell was obtained and refined by 7683 well centered reflections with  $2.5^\circ < \theta < 27.5^\circ$ . Raw intensities were corrected for Lorentz and polarization effects, and for absorption by empirical method. Direct phase determination yielded the positions of all non-hydrogen atoms. All non-hydrogen atoms were subjected to anisotropic refinement. All hydrogen atoms were generated geometrically with C-H bond distances of 0.93-0.97 Å according to criteria described in the SHELXTL manual (Bruker, 1997). They were included in the refinement with  $U_{\text{iso}}(\text{H}) = 1.2U_{\text{eq}}(\text{C})$  or  $1.5U_{\text{eq}}(\text{methyl C})$ . The final full-matrix least-square refinement on  $F^2$  converged with  $R1 = 0.0547$  and  $wR2 = 0.1044$  for 4281 observed reflections [ $I \geq 2\sigma(I)$ ]. The final difference electron density map shows no features. Details of crystal parameters, data collection and structure refinement are given in Table 1.

Data collection was controlled by Crystalclear program. Computations were performed using the SHELXTL NT ver. 5.10 program package (Bruker, 1997) on a IBM PC 586 computer. Analytic expressions of atomic scattering factors were employed, and anomalous dispersion corrections were incorporated (*International Tables for X-ray Crystallography*, 1989). Crystal drawing were produced with XP (Bruker, 1998).

### References

- Bruker.(1997) SHELXTL. Structure Determination Programs, Version 5.10, Bruker AXS Inc.,6300 Enterprise Lane, Madison, WI53719-1173, USA.
- International Tables for X-ray Crystallography*: (1989) Vol. C (Kluwer Academic Publishers, Dordrecht) Tables 4.2.6.8 and 6.1.1.4.

Table 1. Details of Data Collection, Processing and Structure Refinement

|                                                                                        |                                                                                                                                                                                                                                        |                                                                         |
|----------------------------------------------------------------------------------------|----------------------------------------------------------------------------------------------------------------------------------------------------------------------------------------------------------------------------------------|-------------------------------------------------------------------------|
| Sample code                                                                            | <b>2</b>                                                                                                                                                                                                                               |                                                                         |
| Molecular formula                                                                      | [Ag <sub>4</sub> I <sub>8</sub> ]·4[(C <sub>2</sub> H <sub>5</sub> ) <sub>3</sub> (C <sub>7</sub> H <sub>7</sub> )N]                                                                                                                   |                                                                         |
| Molecular weight                                                                       | 2215.94                                                                                                                                                                                                                                |                                                                         |
| Color and habit                                                                        | colorless plate                                                                                                                                                                                                                        |                                                                         |
| Crystal size                                                                           | 0.1 × 0.1 × 0.1 mm                                                                                                                                                                                                                     |                                                                         |
| Crystal system                                                                         | triclinic                                                                                                                                                                                                                              |                                                                         |
| Space group                                                                            | <i>P</i> $\bar{1}$ (No. 2)                                                                                                                                                                                                             |                                                                         |
| Unit cell parameters                                                                   | $a = 10.0164(8) \text{ \AA}$ $\alpha = 89.2116(19)^\circ$<br>$b = 12.4022(9) \text{ \AA}$ $\beta = 73.399(2)^\circ$<br>$c = 14.8694(10) \text{ \AA}$ $\gamma = 73.308(2)^\circ$<br>$V = 1690.9(2) \text{ \AA}^3 Z = 1$ $F(000) = 1040$ |                                                                         |
| Density (calcd)                                                                        | 2.176 g/cm <sup>3</sup>                                                                                                                                                                                                                |                                                                         |
| Diffractometer                                                                         | Rigaku RAXIS-RAPID                                                                                                                                                                                                                     |                                                                         |
| Radiation                                                                              | graphite-monochromatized Mo K $\alpha$ , $\lambda = 0.71073 \text{ \AA}$                                                                                                                                                               |                                                                         |
| Temperature                                                                            | 295±2K                                                                                                                                                                                                                                 |                                                                         |
| Scan type                                                                              | $\omega$ -scan                                                                                                                                                                                                                         |                                                                         |
| Data collection range                                                                  | -13 < <i>h</i> < 13, -16 < <i>k</i> < 16, -19 < <i>l</i> < 19; $\theta_{\max} = 27.5^\circ$                                                                                                                                            |                                                                         |
| Reflections measured                                                                   | Total: 16829                                                                                                                                                                                                                           | Unique ( <i>n</i> ): 7683    Observed [ <i>I</i> ≥ 2σ( <i>I</i> ): 4281 |
| Absorption coefficient                                                                 | 4.827 mm <sup>-1</sup>                                                                                                                                                                                                                 |                                                                         |
| Minimum and maximum transmission                                                       | 0.122, 1.000                                                                                                                                                                                                                           |                                                                         |
| No. of variables, <i>p</i>                                                             | 308                                                                                                                                                                                                                                    |                                                                         |
| Weighting scheme                                                                       | $w = \frac{1}{\sigma^2(F_o^2) + (0.005P)^2 + 20P}$ $P = (F_o^2 + 2F_c^2)/3$                                                                                                                                                            |                                                                         |
| $R1 = \frac{\sum   F_o  -  F_c  }{\sum  F_o }$ (for all reflections)                   | 0.1152                                                                                                                                                                                                                                 | 0.0547 (for observed data)                                              |
| $wR2 = \sqrt{\frac{\sum [w(F_o^2 - F_c^2)^2]}{\sum w(F_o^2)^2}}$ (for all reflections) | 0.1624                                                                                                                                                                                                                                 | 0.1044 (for observed data)                                              |
| Goof = $S = \sqrt{\frac{\sum [w(F_o^2 - F_c^2)^2]}{n - p}}$                            | 1.223                                                                                                                                                                                                                                  |                                                                         |
| Largest and mean Δ/σ                                                                   | 0.000, 0.000                                                                                                                                                                                                                           |                                                                         |
| Residual extrema in final difference map                                               | -2.471 to 1.817 e $\text{\AA}^{-3}$                                                                                                                                                                                                    |                                                                         |



Table 2. Atomic coordinates and equivalent isotropic temperature factors\* ( $\text{\AA}^2$ )

| Atoms | <i>x</i>    | <i>y</i>    | <i>z</i>   | <i>U</i> <sub>eq.</sub> |
|-------|-------------|-------------|------------|-------------------------|
| Ag(1) | 0.93137(13) | 0.42069(10) | 0.60166(7) | 0.0650(3)               |
| Ag(2) | 0.80093(13) | 0.26857(10) | 0.79514(7) | 0.0632(3)               |
| I(1)  | 0.81422(10) | 0.49103(7)  | 0.80363(6) | 0.0533(3)               |
| I(2)  | 0.89995(10) | 0.19362(7)  | 0.60808(6) | 0.0546(3)               |
| I(3)  | 0.78175(10) | 0.56243(8)  | 0.48437(6) | 0.0515(3)               |
| I(4)  | 0.71295(14) | 0.16186(9)  | 0.94931(6) | 0.0720(3)               |
| N(1)  | 0.3057(10)  | 0.5481(8)   | 0.8213(6)  | 0.038(2)                |
| N(2)  | 0.3185(10)  | 0.1041(7)   | 0.2840(6)  | 0.035(2)                |
| C(1)  | 0.3140(13)  | 0.7311(9)   | 0.7409(8)  | 0.040(3)                |
| C(2)  | 0.2129(15)  | 0.8345(11)  | 0.7795(9)  | 0.054(3)                |
| C(3)  | 0.1617(18)  | 0.9141(12)  | 0.7248(11) | 0.067(4)                |
| C(4)  | 0.2069(17)  | 0.8958(12)  | 0.6289(12) | 0.067(4)                |
| C(5)  | 0.3096(16)  | 0.7939(13)  | 0.5871(10) | 0.063(4)                |
| C(6)  | 0.3627(15)  | 0.7145(11)  | 0.6425(8)  | 0.052(3)                |
| C(7)  | 0.3709(13)  | 0.6461(10)  | 0.8026(9)  | 0.047(3)                |
| C(8)  | 0.3701(15)  | 0.4823(10)  | 0.8913(8)  | 0.049(3)                |
| C(9)  | 0.3214(19)  | 0.3774(12)  | 0.9194(10) | 0.073(5)                |
| C(10) | 0.1410(13)  | 0.5901(11)  | 0.8563(8)  | 0.047(3)                |
| C(11) | 0.0766(16)  | 0.6529(12)  | 0.9527(9)  | 0.065(4)                |
| C(12) | 0.3417(14)  | 0.4754(11)  | 0.7304(7)  | 0.048(3)                |
| C(13) | 0.5002(17)  | 0.4145(12)  | 0.6851(9)  | 0.071(4)                |
| C(14) | 0.5383(13)  | -0.0745(9)  | 0.2308(7)  | 0.038(3)                |
| C(15) | 0.6049(16)  | -0.1401(10) | 0.2932(8)  | 0.052(3)                |
| C(16) | 0.7542(17)  | -0.1927(13) | 0.2671(10) | 0.066(4)                |
| C(17) | 0.8384(17)  | -0.1810(12) | 0.1802(11) | 0.063(4)                |
| C(18) | 0.7769(16)  | -0.1181(12) | 0.1159(9)  | 0.058(4)                |
| C(19) | 0.6268(14)  | -0.0642(10) | 0.1410(8)  | 0.050(3)                |
| C(20) | 0.3787(13)  | -0.0226(9)  | 0.2587(8)  | 0.041(3)                |
| C(21) | 0.3630(15)  | 0.1703(10)  | 0.2013(8)  | 0.049(3)                |
| C(22) | 0.3040(18)  | 0.1576(13)  | 0.1191(8)  | 0.069(4)                |
| C(23) | 0.3823(14)  | 0.1345(11)  | 0.3578(8)  | 0.048(3)                |
| C(24) | 0.3362(17)  | 0.0901(14)  | 0.4531(9)  | 0.071(4)                |
| C(25) | 0.1564(12)  | 0.1321(9)   | 0.3196(8)  | 0.040(3)                |
| C(26) | 0.0707(13)  | 0.2562(10)  | 0.3453(9)  | 0.052(3)                |

\**U*<sub>eq.</sub> defined as one third of the trace of the orthogonalized **U** tensor.

Table 3. Bond lengths (Å) and bond angles (°)

|                                 |            |                   |           |
|---------------------------------|------------|-------------------|-----------|
| Ag(1)-I(3) <sup>#1</sup>        | 2.8592(15) | C(1)-C(7)         | 1.485(16) |
| Ag(1)-I(3)                      | 2.8764(15) | C(2)-C(3)         | 1.352(19) |
| Ag(1)-I(2)                      | 2.9195(15) | C(3)-C(4)         | 1.37(2)   |
| Ag(1)-I(1)                      | 2.9373(13) | C(4)-C(5)         | 1.40(2)   |
| Ag(2)-I(4)                      | 2.6862(14) | C(5)-C(6)         | 1.364(17) |
| Ag(2)-I(2)                      | 2.7477(14) | C(8)-C(9)         | 1.529(17) |
| Ag(2)-I(1)                      | 2.8065(15) | C(10)-C(11)       | 1.513(16) |
| I(3)-Ag(1) <sup>#1</sup>        | 2.8592(15) | C(12)-C(13)       | 1.503(18) |
| N(1)-C(8)                       | 1.491(14)  | C(14)-C(19)       | 1.403(16) |
| N(1)-C(10)                      | 1.513(15)  | C(14)-C(15)       | 1.411(16) |
| N(1)-C(7)                       | 1.524(14)  | C(14)-C(20)       | 1.477(16) |
| N(1)-C(12)                      | 1.530(13)  | C(15)-C(16)       | 1.389(19) |
| N(2)-C(25)                      | 1.492(14)  | C(16)-C(17)       | 1.36(2)   |
| N(2)-C(21)                      | 1.502(13)  | C(17)-C(18)       | 1.394(19) |
| N(2)-C(23)                      | 1.519(14)  | C(18)-C(19)       | 1.398(18) |
| N(2)-C(20)                      | 1.522(14)  | C(21)-C(22)       | 1.530(17) |
| C(1)-C(2)                       | 1.394(17)  | C(23)-C(24)       | 1.509(17) |
| C(1)-C(6)                       | 1.400(16)  | C(25)-C(26)       | 1.524(15) |
| I(3) <sup>#1</sup> -Ag(1)-I(3)  | 98.86(4)   | C(21)-N(2)-C(20)  | 112.0(8)  |
| I(3) <sup>#1</sup> -Ag(1)-I(2)  | 116.43(5)  | C(23)-N(2)-C(20)  | 108.9(9)  |
| I(3)-Ag(1)-I(2)                 | 113.93(5)  | C(2)-C(1)-C(6)    | 116.9(11) |
| I(3) <sup>#1</sup> -Ag(1)-I(1)  | 114.58(5)  | C(2)-C(1)-C(7)    | 120.4(11) |
| I(3)-Ag(1)-I(1)                 | 114.94(5)  | C(6)-C(1)-C(7)    | 122.6(11) |
| I(2)-Ag(1)-I(1)                 | 99.04(4)   | C(3)-C(2)-C(1)    | 121.6(13) |
| I(4)-Ag(2)-I(2)                 | 130.47(5)  | C(2)-C(3)-C(4)    | 121.0(14) |
| I(4)-Ag(2)-I(1)                 | 122.84(5)  | C(3)-C(4)-C(5)    | 119.4(13) |
| I(2)-Ag(2)-I(1)                 | 106.66(4)  | C(6)-C(5)-C(4)    | 119.4(13) |
| Ag(2)-I(1)-Ag(1)                | 76.52(4)   | C(5)-C(6)-C(1)    | 121.7(13) |
| Ag(2)-I(2)-Ag(1)                | 77.73(4)   | C(1)-C(7)-N(1)    | 116.8(10) |
| Ag(1) <sup>#1</sup> -I(3)-Ag(1) | 81.14(4)   | N(1)-C(8)-C(9)    | 115.0(11) |
| C(8)-N(1)-C(10)                 | 112.3(9)   | N(1)-C(10)-C(11)  | 115.7(10) |
| C(8)-N(1)-C(7)                  | 106.0(9)   | C(13)-C(12)-N(1)  | 116.2(11) |
| C(10)-N(1)-C(7)                 | 111.2(9)   | C(19)-C(14)-C(15) | 118.3(11) |
| C(8)-N(1)-C(12)                 | 111.4(9)   | C(19)-C(14)-C(20) | 121.4(10) |
| C(10)-N(1)-C(12)                | 105.3(9)   | C(15)-C(14)-C(20) | 120.2(11) |
| C(7)-N(1)-C(12)                 | 110.8(8)   | C(16)-C(15)-C(14) | 121.1(12) |
| C(25)-N(2)-C(21)                | 110.7(9)   | C(17)-C(16)-C(15) | 119.8(14) |
| C(25)-N(2)-C(23)                | 111.8(8)   | C(16)-C(17)-C(18) | 120.9(14) |
| C(21)-N(2)-C(23)                | 106.1(9)   | C(17)-C(18)-C(19) | 120.1(13) |
| C(25)-N(2)-C(20)                | 107.4(8)   | C(18)-C(19)-C(14) | 119.7(12) |

(Table 3. continued)

|                  |           |                  |           |
|------------------|-----------|------------------|-----------|
| C(14)-C(20)-N(2) | 118.4(9)  | C(24)-C(23)-N(2) | 116.2(10) |
| N(2)-C(21)-C(22) | 115.6(10) | N(2)-C(25)-C(26) | 117.0(9)  |

Symmetry transformation codes: #1 (2-x, 1-y, 1-z).

### 3 Crystal Structure of $[\text{Ag}_2\text{I}_3]\cdot(\text{CH}_3)_3\text{N}(\text{C}_{12}\text{H}_{25})$

The room temperature ( $295\pm 2^\circ\text{K}$ ) single-crystal X-ray experiments were performed on a Rigaku RAXIS-RAPID diffractometer with monochromatized Mo  $\text{K}_\alpha$  radiation. Unit cell was obtained and refined by 6774 well centered reflections with  $3.2^\circ < \theta < 27.5^\circ$ . No decay was observed except the statistic fluctuation. Raw intensities were corrected for Lorentz and polarization effects, and for absorption by empirical method. Direct phase determination yielded the positions of all Ag and I atoms. The other non-hydrogen atoms were located in the successive Fourier syntheses. All non-hydrogen atoms were subjected to anisotropic refinement. All hydrogen atoms were generated geometrically with C-H bond distances of 0.96-0.97 Å according to criteria described in the SHELXTL manual (Bruker, 1997). They were included in the refinement with  $U_{\text{iso}}(\text{H}) = 1.2U_{\text{eq}}(\text{C})$  or  $1.5U_{\text{eq}}(\text{methyl C})$ . The final full-matrix least-square refinement on  $F^2$  converged with  $R1 = 0.0450$  and  $wR2 = 0.0892$  for 2680 observed reflections [ $I \geq 2\sigma(I)$ ]. The final difference electron density map shows no features. Details of crystal parameters, data collection and structure refinement are given in Table 1.

Data collection was controlled by Crystalclear program. Computations were performed using the SHELXTL NT ver. 5.10 program package (Bruker, 1997) on a IBM PC 586 computer. Analytic expressions of atomic scattering factors were employed, and anomalous dispersion corrections were incorporated (*International Tables for X-ray Crystallography*, 1989). Crystal drawing were produced with XP (Bruker, 1998).

#### References

- Bruker.(1997) SHELXTL. Structure Determination Programs, Version 5.10, Bruker AXS Inc.,6300 Enterprise Lane, Madison, WI53719-1173, USA.
- International Tables for X-ray Crystallography*: (1989) Vol. C (Kluwer Academic Publishers, Dordrecht) Tables 4.2.6.8 and 6.1.1.4.

Table 1. Details of Data Collection, Processing and Structure Refinement

|                                                                                        |                                                                                                                                                                                                                               |                            |                                            |
|----------------------------------------------------------------------------------------|-------------------------------------------------------------------------------------------------------------------------------------------------------------------------------------------------------------------------------|----------------------------|--------------------------------------------|
| Sample code                                                                            | <b>3</b>                                                                                                                                                                                                                      |                            |                                            |
| Molecular formula                                                                      | Ag <sub>2</sub> I <sub>3</sub> ·C <sub>15</sub> H <sub>34</sub> N                                                                                                                                                             |                            |                                            |
| Molecular weight                                                                       | 824.87                                                                                                                                                                                                                        |                            |                                            |
| Color and habit                                                                        | colorless plate                                                                                                                                                                                                               |                            |                                            |
| Crystal size                                                                           | 0.08 × 0.10 × 0.15 mm                                                                                                                                                                                                         |                            |                                            |
| Crystal system                                                                         | triclinic                                                                                                                                                                                                                     |                            |                                            |
| Space group                                                                            | <i>P</i> $\bar{1}$ (No. 2)                                                                                                                                                                                                    |                            |                                            |
| Unit cell parameters                                                                   | $a = 7.1475(6) \text{ \AA}$ $\alpha = 102.28(2)^\circ$<br>$b = 9.7391(7) \text{ \AA}$ $\beta = 98.07(3)^\circ$<br>$c = 18.189(2) \text{ \AA}$ $\gamma = 90.85(2)^\circ$<br>$V = 1223.6(2) \text{ \AA}^3 Z = 2$ $F(000) = 768$ |                            |                                            |
| Density (calcd)                                                                        | 2.239 g/cm <sup>3</sup>                                                                                                                                                                                                       |                            |                                            |
| Diffractometer                                                                         | Rigaku RAXIS-RAPID                                                                                                                                                                                                            |                            |                                            |
| Radiation                                                                              | graphite-monochromatized Mo K $\alpha$ , $\lambda = 0.71073 \text{ \AA}$                                                                                                                                                      |                            |                                            |
| Temperature                                                                            | 295±2K                                                                                                                                                                                                                        |                            |                                            |
| Scan type                                                                              | $\omega$ -scan                                                                                                                                                                                                                |                            |                                            |
| Data collection range                                                                  | -8 < <i>h</i> < 8, -12 < <i>k</i> < 12, -22 < <i>l</i> < 22; $\theta_{\max} = 26.0^\circ$                                                                                                                                     |                            |                                            |
| Reflections measured                                                                   | Total: 10696                                                                                                                                                                                                                  | Unique ( <i>n</i> ): 4785  | Observed [ <i>I</i> ≥ 2σ( <i>I</i> ): 2680 |
| Absorption coefficient                                                                 | 5.381 mm <sup>-1</sup>                                                                                                                                                                                                        |                            |                                            |
| Minimum and maximum transmission                                                       | 1.000, 0.515                                                                                                                                                                                                                  |                            |                                            |
| No. of variables, <i>p</i>                                                             | 195                                                                                                                                                                                                                           |                            |                                            |
| Weighting scheme                                                                       | $w = \frac{1}{\sigma^2(F_o^2) + (0.001P)^2 + 4.0P}$                                                                                                                                                                           |                            | $P = (F_o^2 + 2F_c^2)/3$                   |
| $R1 = \frac{\sum   F_o  -  F_c  }{\sum  F_o }$ (for all reflections)                   | 0.0940                                                                                                                                                                                                                        | 0.0450 (for observed data) |                                            |
| $wR2 = \sqrt{\frac{\sum [w(F_o^2 - F_c^2)^2]}{\sum w(F_o^2)^2}}$ (for all reflections) | 0.1371                                                                                                                                                                                                                        | 0.0892 (for observed data) |                                            |
| Goof = $S = \sqrt{\frac{\sum [w(F_o^2 - F_c^2)^2]}{n - p}}$                            | 1.306                                                                                                                                                                                                                         |                            |                                            |
| Largest and mean Δ/σ                                                                   | 0.002, 0.000                                                                                                                                                                                                                  |                            |                                            |
| Residual extrema in final difference map                                               | -1.422 to 1.101 e $\text{\AA}^{-3}$                                                                                                                                                                                           |                            |                                            |

Table 2. Atomic coordinates and equivalent isotropic temperature factors\* ( $\text{\AA}^2$ )

| Atoms | <i>x</i>    | <i>y</i>   | <i>z</i>   | $U_{eq.}$   |
|-------|-------------|------------|------------|-------------|
| Ag(1) | 0.52729(11) | 0.96717(8) | 0.08500(6) | 0.0974(3)   |
| Ag(2) | 0.03321(11) | 0.96637(8) | 0.08310(5) | 0.0948(3)   |
| I(1)  | 0.26968(8)  | 1.17551(6) | 0.04401(4) | 0.06994(18) |
| I(2)  | 0.28146(8)  | 0.74866(6) | 0.10122(5) | 0.0880(2)   |
| I(3)  | -0.17368(9) | 1.06810(6) | 0.20004(4) | 0.0773(2)   |
| N(1)  | 0.8067(9)   | 0.5311(6)  | 0.1690(5)  | 0.071(2)    |
| C(1)  | 0.6367(12)  | 0.4658(10) | 0.1897(6)  | 0.084(3)    |
| C(2)  | 0.6421(12)  | 0.4585(10) | 0.2716(6)  | 0.086(3)    |
| C(3)  | 0.4540(13)  | 0.4026(11) | 0.2843(6)  | 0.089(3)    |
| C(4)  | 0.4388(14)  | 0.3879(12) | 0.3632(6)  | 0.098(4)    |
| C(5)  | 0.2436(15)  | 0.3417(13) | 0.3745(7)  | 0.115(4)    |
| C(6)  | 0.2176(16)  | 0.3189(13) | 0.4500(7)  | 0.113(4)    |
| C(7)  | 0.0227(15)  | 0.2747(14) | 0.4565(7)  | 0.117(4)    |
| C(8)  | -0.0016(17) | 0.2467(14) | 0.5339(8)  | 0.130(5)    |
| C(9)  | -0.1934(17) | 0.1992(15) | 0.5386(6)  | 0.149(6)    |
| C(10) | -0.2262(13) | 0.1655(16) | 0.6138(7)  | 0.172(7)    |
| C(11) | -0.4364(16) | 0.1244(16) | 0.6106(8)  | 0.241(11)   |
| C(12) | -0.449(3)   | 0.059(2)   | 0.6783(10) | 0.280(13)   |
| C(13) | 0.7717(18)  | 0.5273(18) | 0.0867(7)  | 0.155(6)    |
| C(14) | 0.9815(14)  | 0.4578(11) | 0.1878(9)  | 0.141(5)    |
| C(15) | 0.8304(18)  | 0.6825(9)  | 0.2083(8)  | 0.134(5)    |

\* $U_{eq.}$  defined as one third of the trace of the orthogonalized **U** tensor.

Table 3. Bond lengths (Å) and bond angles (°)

|                                               |            |                                 |           |
|-----------------------------------------------|------------|---------------------------------|-----------|
| Ag(1)-I(3) <sup>#1</sup>                      | 2.7784(14) | N(1)-C(1)                       | 1.493(11) |
| Ag(1)-I(2)                                    | 2.8293(12) | C(1)-C(2)                       | 1.502(14) |
| Ag(1)-I(1)                                    | 2.9038(12) | C(2)-C(3)                       | 1.509(12) |
| Ag(1)-I(1) <sup>#2</sup>                      | 3.0286(14) | C(3)-C(4)                       | 1.491(14) |
| Ag(2)-I(3)                                    | 2.7789(13) | C(4)-C(5)                       | 1.514(14) |
| Ag(2)-I(2)                                    | 2.8280(11) | C(5)-C(6)                       | 1.473(16) |
| Ag(2)-I(1)                                    | 2.8917(12) | C(6)-C(7)                       | 1.479(14) |
| Ag(2)-I(1) <sup>#3</sup>                      | 3.0148(14) | C(7)-C(8)                       | 1.524(17) |
| I(3)-Ag(1) <sup>#4</sup>                      | 2.7785(14) | C(8)-C(9)                       | 1.460(15) |
| N(1)-C(13)                                    | 1.475(14)  | C(9)-C(10)                      | 1.520(9)  |
| N(1)-C(14)                                    | 1.482(11)  | C(10)-C(11)                     | 1.539(9)  |
| N(1)-C(15)                                    | 1.492(10)  | C(11)-C(12)                     | 1.514(9)  |
| I(3) <sup>#1</sup> -Ag(1)-I(2)                | 119.11(4)  | Ag(1) <sup>#4</sup> -I(3)-Ag(2) | 81.32(3)  |
| I(3) <sup>#1</sup> -Ag(1)-I(1)                | 115.87(4)  | C(13)-N(1)-C(14)                | 110.1(9)  |
| I(2)-Ag(1)-I(1)                               | 103.23(3)  | C(13)-N(1)-C(15)                | 106.5(10) |
| I(3) <sup>#1</sup> -Ag(1)-I(1) <sup>#2</sup>  | 102.11(3)  | C(14)-N(1)-C(15)                | 109.9(8)  |
| I(2)-Ag(1)-I(1) <sup>#2</sup>                 | 102.73(4)  | C(13)-N(1)-C(1)                 | 108.0(8)  |
| I(1)-Ag(1)-I(1) <sup>#2</sup>                 | 113.35(4)  | C(14)-N(1)-C(1)                 | 112.3(8)  |
| I(3)-Ag(2)-I(2)                               | 117.82(4)  | C(15)-N(1)-C(1)                 | 109.8(8)  |
| I(3)-Ag(2)-I(1)                               | 115.01(4)  | N(1)-C(1)-C(2)                  | 117.0(7)  |
| I(2)-Ag(2)-I(1)                               | 103.57(3)  | C(1)-C(2)-C(3)                  | 110.3(8)  |
| I(3)-Ag(2)-I(1) <sup>#3</sup>                 | 102.44(3)  | C(4)-C(3)-C(2)                  | 116.4(8)  |
| I(2)-Ag(2)-I(1) <sup>#3</sup>                 | 103.39(4)  | C(3)-C(4)-C(5)                  | 114.5(9)  |
| I(1)-Ag(2)-I(1) <sup>#3</sup>                 | 114.42(4)  | C(6)-C(5)-C(4)                  | 118.1(10) |
| Ag(2)-I(1)-Ag(1)                              | 74.96(3)   | C(5)-C(6)-C(7)                  | 114.8(10) |
| Ag(2)-I(1)-Ag(2) <sup>#3</sup>                | 65.58(4)   | C(6)-C(7)-C(8)                  | 114.5(10) |
| Ag(1)-I(1)-Ag(2) <sup>#3</sup>                | 109.26(3)  | C(9)-C(8)-C(7)                  | 113.7(10) |
| Ag(2)-I(1)-Ag(1) <sup>#2</sup>                | 108.57(3)  | C(8)-C(9)-C(10)                 | 116.4(10) |
| Ag(1)-I(1)-Ag(1) <sup>#2</sup>                | 66.65(4)   | C(9)-C(10)-C(11)                | 109.9(10) |
| Ag(2) <sup>#3</sup> -I(1)-Ag(1) <sup>#2</sup> | 73.62(3)   | C(12)-C(11)-C(10)               | 106.4(13) |
| Ag(2)-I(2)-Ag(1)                              | 77.13(3)   |                                 |           |

Symmetry transformation codes: #1 (1+x, y, z); #2 (1-x, 2-y, -z);  
 #3 (-x, 2-y, -z); #4 (-1+x, y, z).

## 4 Crystal Structure of $[\text{Ag}_4\text{I}_5]\cdot(\text{CH}_3)_2\text{N}(\text{C}_{12}\text{H}_{25})_2$

The low temperature ( $153\pm 2^\circ\text{K}$ ) single-crystal X-ray experiments were performed on a Rigaku Saturn70 diffractometer with monochromatized Mo  $\text{K}_\alpha$  radiation. Unit cell was obtained and refined by 5476 well centered reflections with  $1.7^\circ < \theta < 25.0^\circ$ . No decay was observed except the statistic fluctuation. Raw intensities were corrected for Lorentz and polarization effects, and for absorption by empirical method. Direct phase determination yielded the positions of all Ag and I atoms. The other non-hydrogen atoms were located in the successive Fourier syntheses. All non-hydrogen atoms were subjected to anisotropic refinement. All hydrogen atoms were generated geometrically with C-H bond distances of 0.96-0.98 Å according to criteria described in the SHELXTL manual (Bruker, 1997). They were included in the refinement with  $U_{\text{iso}}(\text{H}) = 1.2U_{\text{eq}}(\text{C})$  or  $1.5U_{\text{eq}}(\text{methyl C})$ . The final full-matrix least-square refinement on  $F^2$  converged with  $R1 = 0.0766$  and  $wR2 = 0.1608$  for 3391 observed reflections [ $I \geq 2\sigma(I)$ ]. The final difference electron density map shows no features. Details of crystal parameters, data collection and structure refinement are given in Table 1.

Data collection was controlled by Crystalclear program. Computations were performed using the SHELXTL NT ver. 5.10 program package (Bruker, 1997) on a IBM PC 586 computer. Analytic expressions of atomic scattering factors were employed, and anomalous dispersion corrections were incorporated (*International Tables for X-ray Crystallography*, 1989). Crystal drawing were produced with XP (Bruker, 1998).

### References

- Bruker.(1997) SHELXTL. Structure Determination Programs, Version 5.10, Bruker AXS Inc.,6300 Enterprise Lane, Madison, WI 53719-1173, USA.
- International Tables for X-ray Crystallography*: (1989) Vol. C (Kluwer Academic Publishers, Dordrecht) Tables 4.2.6.8 and 6.1.1.4.



Table 1. Details of Data Collection, Processing and Structure Refinement

|                                                                                        |                                                                                                                                                                                                                       |                            |
|----------------------------------------------------------------------------------------|-----------------------------------------------------------------------------------------------------------------------------------------------------------------------------------------------------------------------|----------------------------|
| Sample code                                                                            | <b>4</b>                                                                                                                                                                                                              |                            |
| Molecular formula                                                                      | Ag <sub>4</sub> I <sub>5</sub> ·C <sub>26</sub> H <sub>56</sub> N                                                                                                                                                     |                            |
| Molecular weight                                                                       | 1448.70                                                                                                                                                                                                               |                            |
| Color and habit                                                                        | colorless plate                                                                                                                                                                                                       |                            |
| Crystal size                                                                           | 0.05 × 0.07 × 0.10 mm                                                                                                                                                                                                 |                            |
| Crystal system                                                                         | triclinic                                                                                                                                                                                                             |                            |
| Space group                                                                            | $P\bar{1}$ (No. 2)                                                                                                                                                                                                    |                            |
| Unit cell parameters                                                                   | $a = 9.189(3)\text{Å}$ $\alpha = 83.515(13)^\circ$<br>$b = 10.093(3)\text{Å}$ $\beta = 88.522(13)^\circ$<br>$c = 23.519(9)\text{Å}$ $\gamma = 68.316(12)^\circ$<br>$V = 2013.6(11)\text{Å}^3$ $Z = 2$ $F(000) = 1344$ |                            |
| Density (calcd)                                                                        | 2.389 g/cm <sup>3</sup>                                                                                                                                                                                               |                            |
| Diffractometer                                                                         | Rigaku Saturn70                                                                                                                                                                                                       |                            |
| Radiation                                                                              | graphite-monochromatized Mo K <sub>α</sub> , $\lambda = 0.71073$ ?                                                                                                                                                    |                            |
| Temperature                                                                            | 295±2K                                                                                                                                                                                                                |                            |
| Scan type                                                                              | ω-scan                                                                                                                                                                                                                |                            |
| Data collection range                                                                  | -10 <h< 10, -12 <k< 11, -28 <l< 28; $\theta_{\max} = 25.0^\circ$                                                                                                                                                      |                            |
| Reflections measured                                                                   | Total: 17431    Unique (n): 6953    Observed [ $I \geq 2\sigma(I)$ ]: 3391                                                                                                                                            |                            |
| Absorption coefficient                                                                 | 5.766 mm <sup>-1</sup>                                                                                                                                                                                                |                            |
| Minimum and maximum transmission                                                       | 1.000, 0.304                                                                                                                                                                                                          |                            |
| No. of variables, <i>p</i>                                                             | 326                                                                                                                                                                                                                   |                            |
| Weighting scheme                                                                       | $w = \frac{1}{\sigma^2(F_o^2) + (0.001P)^2 + 2.5P}$ $P = (F_o^2 + 2F_c^2)/3$                                                                                                                                          |                            |
| $R1 = \frac{\sum   F_o  -  F_c  }{\sum  F_o }$ (for all reflections)                   | 0.1034                                                                                                                                                                                                                | 0.0766 (for observed data) |
| $wR2 = \sqrt{\frac{\sum [w(F_o^2 - F_c^2)^2]}{\sum w(F_o^2)^2}}$ (for all reflections) | 0.1693                                                                                                                                                                                                                | 0.1608 (for observed data) |
| Goof = $S = \sqrt{\frac{\sum [w(F_o^2 - F_c^2)^2]}{n - p}}$                            | 1.277                                                                                                                                                                                                                 |                            |
| Largest and mean $\Delta/\sigma$                                                       | 0.009, 0.000                                                                                                                                                                                                          |                            |
| Residual extrema in final difference map                                               | -2.160 to 1.989 eÅ <sup>-3</sup>                                                                                                                                                                                      |                            |

Table 2. Atomic coordinates and equivalent isotropic temperature factors\* ( $\text{\AA}^2$ )

| Atoms | <i>x</i>    | <i>y</i>    | <i>z</i>   | $U_{eq.}$ |
|-------|-------------|-------------|------------|-----------|
| I(1)  | 1.25036(9)  | -0.02121(8) | 1.14280(4) | 0.0555(3) |
| I(2)  | 1.01285(9)  | 0.45790(7)  | 1.14182(4) | 0.0499(2) |
| I(3)  | 1.39088(9)  | 0.26138(7)  | 0.99914(4) | 0.0491(2) |
| I(4)  | 0.87372(8)  | 0.24554(7)  | 0.99957(3) | 0.0492(2) |
| I(5)  | 0.75256(9)  | 0.94411(8)  | 1.13933(4) | 0.0546(2) |
| Ag(1) | 1.12742(13) | 0.24779(10) | 1.06915(5) | 0.0721(4) |
| Ag(2) | 0.88165(13) | 0.70853(10) | 1.07049(5) | 0.0726(4) |
| Ag(3) | 1.50651(13) | 0.01647(11) | 0.93243(5) | 0.0788(4) |
| Ag(4) | 0.99852(13) | 0.02004(11) | 0.92531(5) | 0.0750(4) |
| N(1)  | 0.4904(9)   | 0.5383(8)   | 0.8368(4)  | 0.039(2)  |
| C(1)  | 0.4190(11)  | 0.4547(10)  | 0.8046(5)  | 0.042(3)  |
| C(2)  | 0.5186(11)  | 0.3806(9)   | 0.7577(4)  | 0.035(3)  |
| C(3)  | 0.4445(13)  | 0.2934(10)  | 0.7300(5)  | 0.058(4)  |
| C(4)  | 0.5409(14)  | 0.2075(10)  | 0.6834(5)  | 0.061(4)  |
| C(5)  | 0.5668(14)  | 0.2994(10)  | 0.6314(5)  | 0.060(4)  |
| C(6)  | 0.6615(14)  | 0.2123(11)  | 0.5845(5)  | 0.061(4)  |
| C(7)  | 0.6914(15)  | 0.2933(11)  | 0.5315(5)  | 0.064(4)  |
| C(8)  | 0.7765(15)  | 0.2072(12)  | 0.4848(5)  | 0.072(5)  |
| C(9)  | 0.8097(15)  | 0.2896(12)  | 0.4323(6)  | 0.073(5)  |
| C(10) | 0.8936(14)  | 0.1995(12)  | 0.3870(6)  | 0.066(4)  |
| C(11) | 0.9370(16)  | 0.2730(13)  | 0.3350(6)  | 0.088(5)  |
| C(12) | 1.0263(17)  | 0.1777(14)  | 0.2877(7)  | 0.109(6)  |
| C(13) | 0.5405(11)  | 0.6430(10)  | 0.7986(5)  | 0.043(3)  |
| C(14) | 0.4161(13)  | 0.7468(11)  | 0.7582(5)  | 0.053(4)  |
| C(15) | 0.4813(16)  | 0.8296(12)  | 0.7132(6)  | 0.077(5)  |
| C(16) | 0.5703(15)  | 0.7355(12)  | 0.6654(6)  | 0.078(5)  |
| C(17) | 0.6089(14)  | 0.8125(11)  | 0.6142(5)  | 0.060(4)  |
| C(18) | 0.6934(15)  | 0.7208(12)  | 0.5684(5)  | 0.066(4)  |
| C(19) | 0.7230(16)  | 0.7992(12)  | 0.5149(6)  | 0.078(5)  |
| C(20) | 0.8064(14)  | 0.7118(11)  | 0.4687(6)  | 0.064(4)  |
| C(21) | 0.8381(15)  | 0.7889(12)  | 0.4140(6)  | 0.071(4)  |
| C(22) | 0.9281(15)  | 0.6984(12)  | 0.3696(6)  | 0.072(5)  |
| C(23) | 0.9566(17)  | 0.7751(15)  | 0.3137(7)  | 0.096(6)  |
| C(24) | 1.0431(16)  | 0.6814(17)  | 0.2701(7)  | 0.126(7)  |
| C(25) | 0.6267(12)  | 0.4400(11)  | 0.8741(5)  | 0.061(4)  |
| C(26) | 0.3640(12)  | 0.6227(10)  | 0.8773(5)  | 0.055(3)  |

\* $U_{eq.}$  defined as one third of the trace of the orthogonalized  $U$  tensor.

Table 3. Bond lengths (Å) and bond angles (°)

|                                               |            |                                               |           |
|-----------------------------------------------|------------|-----------------------------------------------|-----------|
| I(1)-Ag(4) <sup>#1</sup>                      | 2.8215(16) | N(1)-C(25)                                    | 1.504(11) |
| I(1)-Ag(3) <sup>#2</sup>                      | 2.8249(17) | N(1)-C(1)                                     | 1.515(12) |
| I(1)-Ag(1)                                    | 2.9017(15) | N(1)-C(26)                                    | 1.541(12) |
| I(2)-Ag(2)                                    | 2.7494(15) | C(1)-C(2)                                     | 1.498(13) |
| I(2)-Ag(1)                                    | 2.7573(15) | C(2)-C(3)                                     | 1.502(13) |
| I(3)-Ag(3) <sup>#2</sup>                      | 2.9066(15) | C(3)-C(4)                                     | 1.527(15) |
| I(3)-Ag(3)                                    | 2.9241(15) | C(4)-C(5)                                     | 1.517(16) |
| I(3)-Ag(1)                                    | 2.9291(16) | C(5)-C(6)                                     | 1.534(15) |
| I(3)-Ag(2) <sup>#3</sup>                      | 2.9296(15) | C(6)-C(7)                                     | 1.488(16) |
| I(4)-Ag(1)                                    | 2.8909(15) | C(7)-C(8)                                     | 1.498(16) |
| I(4)-Ag(2) <sup>#3</sup>                      | 2.8964(16) | C(8)-C(9)                                     | 1.500(17) |
| I(4)-Ag(4) <sup>#1</sup>                      | 2.8977(15) | C(9)-C(10)                                    | 1.488(16) |
| I(4)-Ag(4)                                    | 2.9003(15) | C(10)-C(11)                                   | 1.480(17) |
| I(5)-Ag(4) <sup>#3</sup>                      | 2.8252(16) | C(11)-C(12)                                   | 1.565(18) |
| I(5)-Ag(3) <sup>#3</sup>                      | 2.8336(16) | C(13)-C(14)                                   | 1.501(13) |
| I(5)-Ag(2)                                    | 2.8928(15) | C(14)-C(15)                                   | 1.522(16) |
| Ag(2)-I(4) <sup>#3</sup>                      | 2.8964(16) | C(15)-C(16)                                   | 1.566(16) |
| Ag(2)-I(3) <sup>#3</sup>                      | 2.9297(15) | C(16)-C(17)                                   | 1.467(15) |
| Ag(3)-I(1) <sup>#2</sup>                      | 2.8248(17) | C(17)-C(18)                                   | 1.507(15) |
| Ag(3)-I(5) <sup>#3</sup>                      | 2.8336(16) | C(18)-C(19)                                   | 1.482(17) |
| Ag(3)-I(3) <sup>#2</sup>                      | 2.9066(15) | C(19)-C(20)                                   | 1.491(16) |
| Ag(4)-I(1) <sup>#1</sup>                      | 2.8215(16) | C(20)-C(21)                                   | 1.506(17) |
| Ag(4)-I(5) <sup>#3</sup>                      | 2.8252(16) | C(21)-C(22)                                   | 1.491(16) |
| Ag(4)-I(4) <sup>#1</sup>                      | 2.8977(15) | C(22)-C(23)                                   | 1.516(18) |
| N(1)-C(13)                                    | 1.504(12)  | C(23)-C(24)                                   | 1.483(18) |
| Ag(4) <sup>#1</sup> -I(1)-Ag(3) <sup>#2</sup> | 106.80(5)  | Ag(4) <sup>#3</sup> -I(5)-Ag(3) <sup>#3</sup> | 110.94(5) |
| Ag(4) <sup>#1</sup> -I(1)-Ag(1)               | 70.40(4)   | Ag(4) <sup>#3</sup> -I(5)-Ag(2)               | 70.98(4)  |
| Ag(3) <sup>#2</sup> -I(1)-Ag(1)               | 73.77(4)   | Ag(3) <sup>#3</sup> -I(5)-Ag(2)               | 78.34(4)  |
| Ag(2)-I(2)-Ag(1)                              | 104.64(5)  | I(2)-Ag(1)-I(4)                               | 109.52(4) |
| Ag(3) <sup>#2</sup> -I(3)-Ag(3)               | 65.68(5)   | I(2)-Ag(1)-I(1)                               | 105.60(5) |
| Ag(3) <sup>#2</sup> -I(3)-Ag(1)               | 72.18(4)   | I(4)-Ag(1)-I(1)                               | 109.01(4) |
| Ag(3)-I(3)-Ag(1)                              | 110.16(4)  | I(2)-Ag(1)-I(3)                               | 115.25(4) |
| Ag(3) <sup>#2</sup> -I(3)-Ag(2) <sup>#3</sup> | 108.61(4)  | I(4)-Ag(1)-I(3)                               | 111.58(5) |
| Ag(3)-I(3)-Ag(2) <sup>#3</sup>                | 76.33(4)   | I(1)-Ag(1)-I(3)                               | 105.48(4) |
| Ag(1)-I(3)-Ag(2) <sup>#3</sup>                | 67.69(4)   | I(2)-Ag(2)-I(5)                               | 108.88(5) |
| Ag(1)-I(4)-Ag(2) <sup>#3</sup>                | 68.64(5)   | I(2)-Ag(2)-I(4) <sup>#3</sup>                 | 108.43(4) |
| Ag(1)-I(4)-Ag(4) <sup>#1</sup>                | 69.50(4)   | I(5)-Ag(2)-I(4) <sup>#3</sup>                 | 108.61(4) |
| Ag(2) <sup>#3</sup> -I(4)-Ag(4) <sup>#1</sup> | 110.19(4)  | I(2)-Ag(2)-I(3) <sup>#3</sup>                 | 117.29(5) |
| Ag(1)-I(4)-Ag(4)                              | 108.56(4)  | I(5)-Ag(2)-I(3) <sup>#3</sup>                 | 101.78(4) |
| Ag(2) <sup>#3</sup> -I(4)-Ag(4)               | 69.89(4)   | I(4) <sup>#3</sup> -Ag(2)-I(3) <sup>#3</sup>  | 111.41(5) |
| Ag(4) <sup>#1</sup> -I(4)-Ag(4)               | 74.03(5)   | I(1) <sup>#2</sup> -Ag(3)-I(5) <sup>#3</sup>  | 105.25(5) |

(Table 3. continued)

|                                              |           |                   |           |
|----------------------------------------------|-----------|-------------------|-----------|
| I(1) <sup>#2</sup> -Ag(3)-I(3) <sup>#2</sup> | 108.13(4) | C(5)-C(4)-C(3)    | 114.0(8)  |
| I(5) <sup>#3</sup> -Ag(3)-I(3) <sup>#2</sup> | 111.39(5) | C(4)-C(5)-C(6)    | 113.7(8)  |
| I(1) <sup>#2</sup> -Ag(3)-I(3)               | 113.98(5) | C(7)-C(6)-C(5)    | 117.6(9)  |
| I(5) <sup>#3</sup> -Ag(3)-I(3)               | 103.37(4) | C(6)-C(7)-C(8)    | 116.9(10) |
| I(3) <sup>#2</sup> -Ag(3)-I(3)               | 114.32(5) | C(7)-C(8)-C(9)    | 116.4(10) |
| I(1) <sup>#1</sup> -Ag(4)-I(5) <sup>#3</sup> | 113.35(5) | C(10)-C(9)-C(8)   | 114.4(10) |
| I(1) <sup>#1</sup> -Ag(4)-I(4) <sup>#1</sup> | 111.09(4) | C(11)-C(10)-C(9)  | 117.4(11) |
| I(5) <sup>#3</sup> -Ag(4)-I(4) <sup>#1</sup> | 107.69(4) | C(10)-C(11)-C(12) | 117.2(11) |
| I(1) <sup>#1</sup> -Ag(4)-I(4)               | 108.10(4) | C(14)-C(13)-N(1)  | 115.2(9)  |
| I(5) <sup>#3</sup> -Ag(4)-I(4)               | 110.40(4) | C(13)-C(14)-C(15) | 112.5(10) |
| I(4) <sup>#1</sup> -Ag(4)-I(4)               | 105.97(5) | C(14)-C(15)-C(16) | 112.1(9)  |
| C(13)-N(1)-C(25)                             | 109.4(8)  | C(17)-C(16)-C(15) | 116.1(10) |
| C(13)-N(1)-C(1)                              | 113.5(8)  | C(16)-C(17)-C(18) | 115.5(10) |
| C(25)-N(1)-C(1)                              | 111.6(7)  | C(19)-C(18)-C(17) | 115.7(10) |
| C(13)-N(1)-C(26)                             | 108.4(7)  | C(18)-C(19)-C(20) | 117.2(10) |
| C(25)-N(1)-C(26)                             | 106.7(8)  | C(19)-C(20)-C(21) | 118.2(10) |
| C(1)-N(1)-C(26)                              | 106.9(8)  | C(22)-C(21)-C(20) | 117.0(10) |
| C(2)-C(1)-N(1)                               | 114.3(8)  | C(21)-C(22)-C(23) | 117.4(11) |
| C(1)-C(2)-C(3)                               | 111.2(8)  | C(24)-C(23)-C(22) | 115.8(13) |
| C(2)-C(3)-C(4)                               | 115.3(9)  |                   |           |

Symmetry transformation codes: #1 (2-x, -y, 2-z); #2 (3-x, -y, 2-z);

#3 (2-x, 1-y, 2-z).
